# Supplementary material for: Cu(ii)-catalyzed cyclization of α-diazo-β-oxoamides with amines leading to pyrrol-3(2H)-ones
Source: Royal Society of Chemistry journal article supplement (doi:10.1039/c2cc38473f), 2013-01-01

*Supporting Information for:*

**Cu(II)-Catalyzed cyclization of  $\alpha$ -diazo- $\beta$ -oxoamides with amines leading to pyrrol-3(2H)-ones**

Zikun Wang,<sup>a</sup> Xihe Bi,<sup>b,c\*</sup> Peiqiu Liao,<sup>b</sup> Xu Liu,<sup>a</sup> Dewen Dong<sup>a,b\*</sup>

<sup>a</sup> Changchun Institute of Applied Chemistry, Chinese Academy of Science, Changchun 130022, P.R. of China. <sup>b</sup> Department of Chemistry, Northeast Normal University, Changchun 130024, China. <sup>c</sup> State Key Laboratory and Institute of Elemento-organic Chemistry, Tianjin 300071, China.

E-mail: [bixh507@nenu.edu.cn](mailto:bixh507@nenu.edu.cn); [dwdong@ciac.jl.cn](mailto:dwdong@ciac.jl.cn)

**Contents**

|                                                                  |         |
|------------------------------------------------------------------|---------|
| Table of contents -----                                          | S1      |
| I. General Information-----                                      | S2      |
| II. Synthesis and analytical data for pyrrol-3(2H)-ones-----     | S2-S9   |
| III. <sup>1</sup> H- and <sup>13</sup> C-NMR Spectra Copies----- | S10-S39 |

## I. General Information

All reagents were purchased from commercial sources and used without treatment, unless otherwise indicated. The products were purified by column chromatography over silica gel.  $^1\text{H}$  NMR and  $^{13}\text{C}$  NMR spectra were recorded at 25 °C at 300MHz or 400MHz and 100MHz, respectively, with TMS as internal standard. Mass spectra were recorded on BRUKER AutoflexIII Smartbeam MS-spectrometer. High resolution mass spectra (HRMS) were recorded on Bruker microTof by using ESI method.

## II. Synthesis and analytical data for compounds 2aa-2aj, 2ba-2bh and 2ca-2cb.

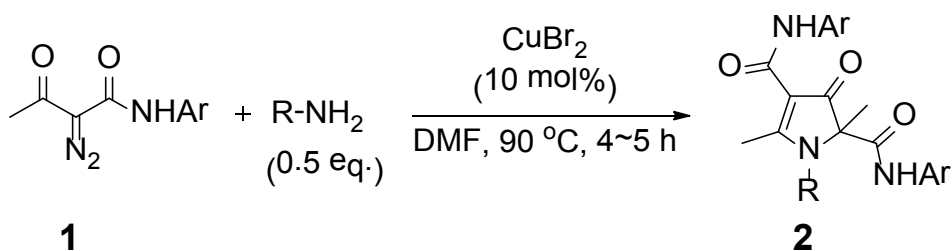

**Synthesis of Pyrrol-3(2H)-ones 2aa-2aj and 2ba-2bh** (with **2aa** as an example): To a solution of the **1a** (2 mmol) and aniline (1 mmol) dissolved in DMF (6 mL) was added 0.1 equiv of  $\text{CuBr}_2$  (0.2 mmol). The mixture was warmed to 90 °C and stirred for 4 h. When **1a** disappeared (monitored by TLC), the reaction mixture was then treated with 50 mL brine, and extracted with dichloromethane ( $2 \times 50$  mL). The combined organic layer was washed with brine ( $3 \times 50$  mL), dried over  $\text{MgSO}_4$  and filtered. The filtrate was concentrated in *vacuum*, and then purified by silica gel column chromatography to give **2aa** as a yellowish solid.

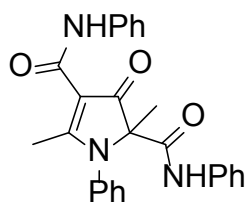

2,5-dimethyl-3-oxo- $N^2, N^4$ ,1-triphenyl-2,3-dihydro-1H-pyrrole-2,4-dicarboxamide

(**2aa**) Yellowish solid; mp 197-200 °C.  $^1\text{H-NMR}$  ( $\text{CDCl}_3$ , 300 MHz)  $\delta$  10.12 (s, 1H), 8.86 (s, 1H), 7.64-7.67 (m, 2H), 7.49-7.54 (m, 5H), 7.43-7.46 (m, 1H), 7.33 (t,  $J = 9.0\text{Hz}$ , 5H), 7.06-7.16 (m, 2H), 2.59 (s, 3H), 1.78 (s, 3H).  $^{13}\text{C-NMR}$  ( $\text{CDCl}_3$ , 100Hz)  $\delta$  195.3, 182.5, 163.2, 161.5, 138.4, 137.0, 135.6, 129.6, 129.5, 128.9, 128.8, 124.8, 123.5, 120.4, 120.0, 103.5, 76.7, 22.1, 16.4. **HRMS** Calcd for  $\text{C}_{26}\text{H}_{24}\text{N}_3\text{O}_3$  ( $[\text{M} + \text{H}]^+$ ) 426.1818; Found 426.1819.

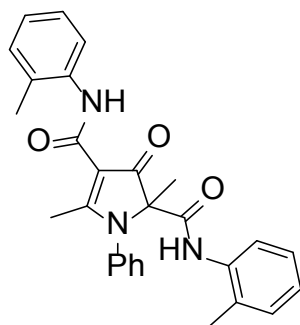

2,5-dimethyl-3-oxo-1-phenyl- $N^2, N^4$ -di-*o*-tolyl-2,3-dihydro-1H-pyrrole-2,4-dicarboxamide

(2ab) White solid; mp 168-170 °C.  $^1\text{H-NMR}$  ( $\text{CDCl}_3$ , 300 MHz)  $\delta$  10.08 (s, 1H), 8.92 (s, 1H), 8.22-8.25 (m, 1H), 7.78-7.81 (m, 1H), 7.46-7.52 (m, 5H), 7.16-7.22 (m, 4H), 7.00-7.10 (m, 2H), 2.60 (s, 3H), 2.41 (s, 3H), 2.32 (s, 3H), 1.83 (s, 3H).  $^{13}\text{C-NMR}$  ( $\text{CDCl}_3$ , 100Hz)  $\delta$  195.7, 182.5, 163.5, 161.4, 136.9, 135.8, 134.9, 130.5, 130.2, 129.8, 129.4, 129.3, 129.2, 127.4, 126.6, 126.4, 125.3, 123.5, 122.4, 121.4, 103.8, 76.5, 22.5, 18.0, 17.5, 16.3. **HRMS** Calcd for  $\text{C}_{28}\text{H}_{28}\text{N}_3\text{O}_3$  ( $[\text{M} + \text{H}]^+$ ) 454.2131; Found 454.2130.

---

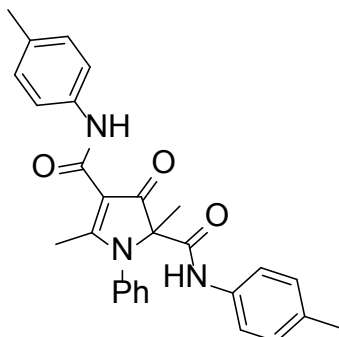

2,5-dimethyl-3-oxo-1-phenyl- $N^2,N^4$ -di-*p*-tolyl-2,3-dihydro-1*H*-pyrrole-2,4-dicarboxamide

(2ac) White solid; mp 178-180 °C.  $^1\text{H-NMR}$  ( $\text{CDCl}_3$ , 300 MHz)  $\delta$  10.05 (s, 1H), 8.76 (s, 1H), 7.47-7.55 (m, 5H), 7.38-7.44 (m, 4H), 7.12 (d,  $J = 9.0\text{Hz}$ , 4H), 2.58 (s, 3H), 2.32 (s, 3H), 2.31 (s, 3H), 1.76 (s, 3H).  $^{13}\text{C-NMR}$  ( $\text{CDCl}_3$ , 100Hz)  $\delta$  195.3, 182.3, 163.1, 161.4, 135.8, 135.7, 134.5, 134.4, 132.9, 129.6, 129.4, 129.3, 120.4, 120.0, 103.6, 76.7, 22.0, 20.8, 16.3. **HRMS** Calcd for  $\text{C}_{28}\text{H}_{28}\text{N}_3\text{O}_3$  ( $[\text{M} + \text{H}]^+$ ) 454.2131; Found 454.2117.

---

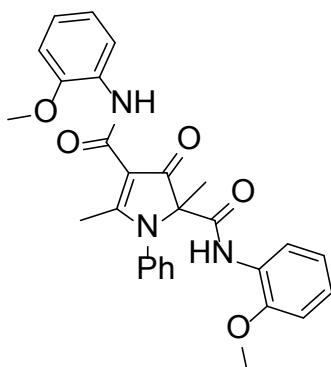

$N^2,N^4$ -bis(2-methoxyphenyl)-2,5-dimethyl-3-oxo-1-phenyl-2,3-dihydro-1*H*-pyrrole-2,4-dicarboxamide

(2ad) White solid; mp 173-176 °C.  $^1\text{H-NMR}$  ( $\text{CDCl}_3$ , 300 MHz)  $\delta$  10.55 (s, 1H), 9.00 (s, 1H), 8.50 (dd,  $J = 8.0\text{ Hz}$ , 1.5 Hz, 1H), 8.20 (dd,  $J = 8.0\text{ Hz}$ , 1.5 Hz, 1H), 7.38-7.50 (m, 5H), 6.98-7.10 (m, 2H), 6.85-6.98 (m, 4H), 3.97 (s, 3H), 3.91 (s, 3H), 2.64 (s, 3H), 1.74 (s, 3H).  $^{13}\text{C-NMR}$  ( $\text{CDCl}_3$ , 100Hz)  $\delta$  195.0, 182.0, 162.8, 161.6, 148.5, 135.8, 129.6, 129.4, 128.6, 126.8, 124.5, 122.9, 121.0, 120.8, 120.1, 110.2, 110.1, 104.1, 77.3, 55.94, 55.90, 20.9, 16.3. **HRMS** Calcd for  $\text{C}_{28}\text{H}_{28}\text{N}_3\text{O}_5$  ( $[\text{M} + \text{H}]^+$ ) 486.2029; Found 486.2013.

---

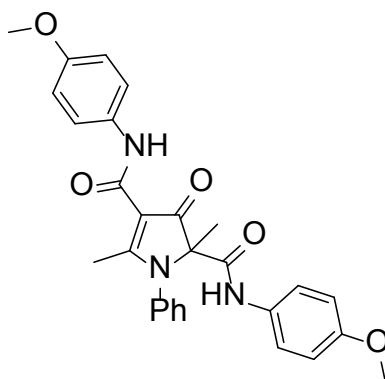

*N*<sup>2</sup>,*N*<sup>4</sup>-bis(4-methoxyphenyl)-2,5-dimethyl-3-oxo-1-phenyl-2,3-dihydro-1*H*-pyrrole-2,4-dicarboxamide

**(2ae)** White solid; mp 156-158 °C. <sup>1</sup>H-NMR (CDCl<sub>3</sub>, 300 MHz) δ 10.00 (s, 1H), 8.72 (s, 1H), 7.53-7.56 (m, 2H), 7.46-7.50 (m, 3H), 7.39-7.43 (m, 4H), 6.84-6.88 (m, 4H), 3.80 (s, 3H), 3.79 (s, 3H), 2.58 (s, 3H), 1.75 (s, 3H). <sup>13</sup>C-NMR (CDCl<sub>3</sub>, 100Hz) δ 195.3, 182.0, 163.0, 161.4, 156.6, 155.8, 135.4, 131.4, 130.2, 129.4, 129.2, 122.3, 121.6, 113.9, 103.4, 76.9, 55.3, 21.3, 16.2. HRMS Calcd for C<sub>28</sub>H<sub>28</sub>N<sub>3</sub>O<sub>5</sub> ([M + H]<sup>+</sup>) 486.2029; Found 486.2019.

---

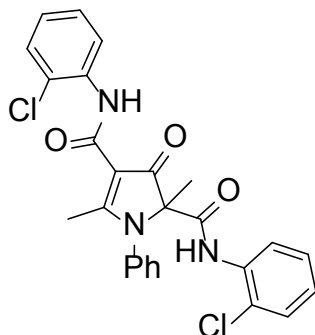

*N*<sup>2</sup>,*N*<sup>4</sup>-bis(2-chlorophenyl)-2,5-dimethyl-3-oxo-1-phenyl-2,3-dihydro-1*H*-pyrrole-2,4-dicarboxamide

**(2af)** Yellow solid; mp 159-161 °C. <sup>1</sup>H-NMR (CDCl<sub>3</sub>, 300 MHz) δ 10.58 (s, 1H), 9.22 (s, 1H), 8.51 (dd, *J* = 1.2Hz, 8.1Hz, 1H), 8.18 (dd, *J* = 1.2Hz, 8.1Hz, 1H), 7.47-7.54 (m, 3H), 7.35-7.46 (m, 4H), 7.22-7.27 (m, 2H), 6.98-7.09 (m, 2H), 2.62 (s, 3H), 1.82 (s, 3H). <sup>13</sup>C-NMR (CDCl<sub>3</sub>, 100Hz) δ 194.9, 182.6, 163.5, 161.6, 135.8, 135.7, 133.8, 129.7, 129.6, 129.5, 129.3, 129.2, 127.5, 127.2, 125.4, 124.2, 123.8, 123.3, 122.0, 121.9, 103.7, 76.9, 21.8, 16.5. HRMS Calcd for C<sub>26</sub>H<sub>22</sub>Cl<sub>2</sub>N<sub>3</sub>O<sub>3</sub> ([M + H]<sup>+</sup>) 494.1028; Found 494.1038.

---

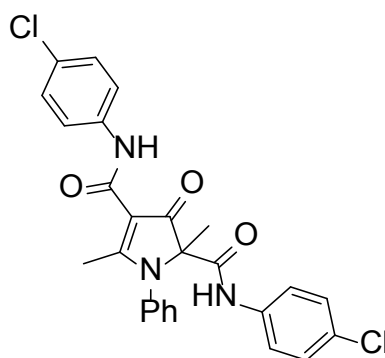

*N*<sup>2</sup>,*N*<sup>4</sup>-bis(4-chlorophenyl)-2,5-dimethyl-3-oxo-1-phenyl-2,3-dihydro-1*H*-pyrrole-2,4-dicarboxamide

**(2ag)** Yellowish solid; mp 150-152 °C. <sup>1</sup>H-NMR (CDCl<sub>3</sub>, 300 MHz) δ 10.12 (s, 1H), 8.91 (s, 1H), 7.60-7.63 (m, 2H), 7.47-7.53 (m, 4H), 7.41-7.47 (m, 3H), 7.27-7.30 (m, 4H), 2.58 (s, 3H), 1.79 (s,

3H).  $^{13}\text{C-NMR}$  ( $\text{CDCl}_3$ , 100Hz)  $\delta$  195.2, 182.7, 163.2, 161.4, 137.0, 135.6, 135.5, 129.9, 129.7, 129.6, 129.5, 129.0, 128.8, 128.4, 121.5, 121.2, 103.4, 76.6, 22.3, 16.4. **HRMS** Calcd for  $\text{C}_{26}\text{H}_{22}\text{Cl}_2\text{N}_3\text{O}_3$  ( $[\text{M} + \text{H}]^+$ ) 494.1038; Found 494.1027.

---

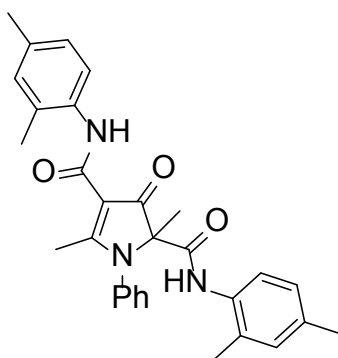

$N^2,N^4$ -bis(2,4-dimethylphenyl)-2,5-dimethyl-3-oxo-1-phenyl-2,3-dihydro-1*H*-pyrrole-2,4-dicarboxamide (**2ah**) Red solid; mp 184-186 °C.  $^1\text{H-NMR}$  ( $\text{CDCl}_3$ , 300 MHz)  $\delta$  10.01 (s, 1H), 8.79 (s, 1H), 8.05-8.08 (m, 1H), 7.60-7.63 (m, 1H), 7.45-7.51 (m, 5H), 6.97-7.02 (m, 4H), 2.59 (s, 3H), 2.37 (s, 3H), 2.30 (s, 3H), 2.27 (s, 3H), 2.25 (s, 3H), 1.81 (s, 3H).  $^{13}\text{C-NMR}$  ( $\text{CDCl}_3$ , 100Hz)  $\delta$  195.7, 182.3, 163.5, 161.4, 135.8, 135.0, 134.2, 133.0, 132.3, 131.1, 130.8, 129.8, 129.5, 129.3, 127.5, 127.0, 126.9, 122.7, 121.5, 103.8, 76.5, 22.2, 20.7, 17.9, 17.4, 16.2. **HRMS** Calcd for  $\text{C}_{30}\text{H}_{32}\text{N}_3\text{O}_3$  ( $[\text{M} + \text{H}]^+$ ) 482.2444; Found 482.2443.

---

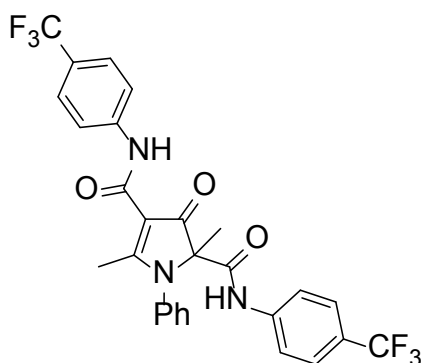

2,5-dimethyl-3-oxo-1-phenyl- $N^2,N^4$ -bis(4-(trifluoromethyl)phenyl)-2,3-dihydro-1*H*-pyrrole-2,4-dicarboxamide

(**2ai**) Yellow solid; mp 209-211 °C.  $^1\text{H-NMR}$  ( $\text{CDCl}_3$ , 300 MHz)  $\delta$  10.28 (s, 1H), 9.11 (s, 1H), 7.76-7.79 (m, 2H), 7.65-7.68 (m, 2H), 7.53-7.60 (m, 7H), 7.44-7.47 (m, 2H), 2.59 (s, 3H), 1.82 (s, 3H).  $^{13}\text{C-NMR}$  ( $\text{CDCl}_3$ , 100Hz)  $\delta$  195.0, 183.0, 163.4, 161.6, 141.6, 140.1, 135.3, 129.8, 129.5, 129.6, 126.2, 126.19, 126.1, 120.0, 119.5, 103.3, 76.8, 22.3, 16.4. **HRMS** Calcd for  $\text{C}_{28}\text{H}_{22}\text{F}_6\text{N}_3\text{O}_3$  ( $[\text{M} + \text{H}]^+$ ) 562.1565; Found 562.1552.

---

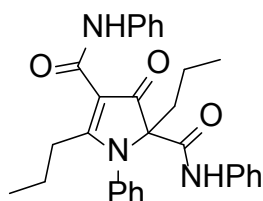

3-oxo- $N^2,N^4,1$ -triphenyl-2,5-dipropyl-2,3-dihydro-1*H*-pyrrole-2,4-dicarboxamide

(**2aj**) Yellow solid; mp: 138-141 °C.  $^1\text{H-NMR}$  ( $\text{CDCl}_3$ , 300 MHz)  $\delta$  10.27 (s, 1H), 8.98 (s, 1H), 7.65-7.68 (m, 2H), 7.41-7.51 (m, 7H), 7.30-7.36 (m, 4H), 7.05-7.10 (m, 2H), 3.00-3.09 (m, 1H),

2.82-2.91 (m, 1H), 2.08-2.22 (m, 2H), 1.63-1.70 (m, 2H), 1.12-1.32 (m, 2H), 0.81-0.98 (m, 6H).  $^{13}\text{C-NMR}$  ( $\text{CDCl}_3$ , 100Hz)  $\delta$  195.3, 186.7, 163.0, 161.0, 138.6, 137.0, 136.0, 129.9, 129.5, 129.3, 129.0, 128.8, 125.6, 124.8, 123.4, 120.2, 119.8, 104.0, 80.5, 37.5, 30.5, 22.1, 16.6, 14.3, 13.7. **HRMS** Calcd for  $\text{C}_{30}\text{H}_{32}\text{N}_3\text{O}_3$  ( $[\text{M} + \text{H}]^+$ ) 482.2444; Found 482.2438.

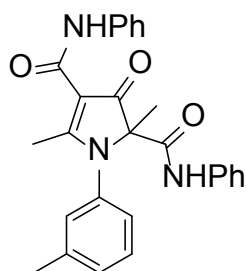

2,5-dimethyl-3-oxo- $N^2, N^4$ -diphenyl-1-(*m*-tolyl)-2,3-dihydro-1*H*-pyrrole-2,4-dicarboxamide

(**2ba**) White solid; mp 178-180 °C.  $^1\text{H-NMR}$  ( $\text{CDCl}_3$ , 300 MHz)  $\delta$  10.11 (s, 1H), 8.77 (s, 1H), 7.64-7.67 (m, 2H), 7.50-7.52 (m, 2H), 7.30-7.40 (m, 6H), 7.21-7.24 (m, 2H), 7.05-7.15 (m, 2H), 2.59 (s, 3H), 2.42 (s, 3H), 1.77 (s, 3H).  $^{13}\text{C-NMR}$  ( $\text{CDCl}_3$ , 100Hz)  $\delta$  195.3, 182.6, 163.3, 161.6, 139.6, 138.5, 137.0, 135.6, 130.3, 130.0, 129.2, 129.0, 128.8, 126.6, 124.8, 123.5, 120.3, 120.0, 103.5, 76.7, 22.1, 21.3, 16.4. **HRMS** Calcd for  $\text{C}_{27}\text{H}_{26}\text{N}_3\text{O}_3$  ( $[\text{M} + \text{H}]^+$ ) 440.1968; Found 440.1974.

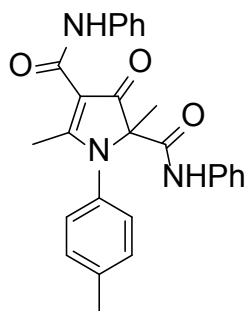

2,5-dimethyl-3-oxo- $N^2, N^4$ -diphenyl-1-(*p*-tolyl)-2,3-dihydro-1*H*-pyrrole-2,4-dicarboxamide

(**2bb**) Yellow solid; mp 171-173 °C.  $^1\text{H-NMR}$  ( $\text{CDCl}_3$ , 300 MHz)  $\delta$  10.14 (s, 1H), 8.86 (s, 1H), 7.64-7.67 (m, 2H), 7.51-7.54 (m, 2H), 7.30-7.35 (m, 8H), 7.06-7.15 (m, 2H), 2.58 (s, 3H), 2.42 (s, 3H), 1.77 (s, 3H).  $^{13}\text{C-NMR}$  ( $\text{CDCl}_3$ , 100Hz)  $\delta$  195.2, 182.5, 163.2, 161.6, 139.6, 138.4, 137.0, 132.7, 130.0, 129.3, 129.1, 128.8, 128.7, 124.8, 123.4, 120.4, 120.0, 119.4, 103.3, 76.7, 21.8, 21.0, 16.2. **HRMS** Calcd for  $\text{C}_{27}\text{H}_{26}\text{N}_3\text{O}_3$  ( $[\text{M} + \text{H}]^+$ ) 440.1974; Found 440.1970.

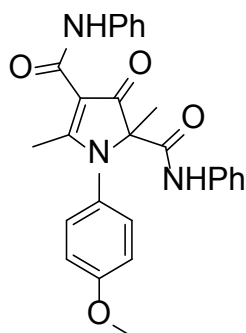

1-(4-methoxyphenyl)-2,5-dimethyl-3-oxo- $N^2, N^4$ -diphenyl-2,3-dihydro-1*H*-pyrrole-2,4-dicarboxamide

(**2bc**) Yellow solid; mp 178-181 °C.  $^1\text{H-NMR}$  ( $\text{CDCl}_3$ , 300 MHz)  $\delta$  10.12 (s, 1H), 8.85 (s, 1H), 7.64-7.66 (m, 2H), 7.50-7.53 (m, 2H), 7.30-7.37 (m, 6H), 7.05-7.15 (m, 2H), 6.97-7.00 (m, 2H), 3.86 (s, 3H), 2.58 (s, 3H), 1.76 (s, 3H).  $^{13}\text{C-NMR}$  ( $\text{CDCl}_3$ , 100Hz)  $\delta$  195.3, 182.8, 163.3, 161.6, 160.1, 138.4, 137.0, 130.8,

128.9, 128.8, 127.9, 124.8, 123.5, 120.3, 120.0, 114.5, 103.3, 76.6, 55.4, 22.1, 16.3. **HRMS** Calcd for  $C_{27}H_{26}N_3O_4$  ( $[M + H]^+$ ) 456.1923; Found 456.1931.

---

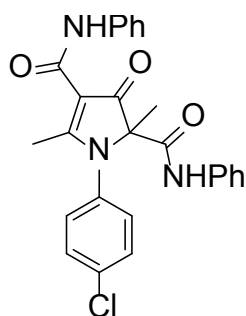

1-(4-chlorophenyl)-2,5-dimethyl-3-oxo- $N^2,N^4$ -diphenyl-2,3-dihydro-1*H*-pyrrole-2,4-dicarboxamide

**(2bd)** Yellow solid; mp 190-192 °C.  **$^1H$ -NMR** ( $CDCl_3$ , 300 MHz)  $\delta$  10.07 (s, 1H), 8.93 (s, 1H), 7.63-7.67 (m, 2H), 7.47-7.52 (m, 4H), 7.40-7.43 (m, 2H), 7.33 (t,  $J = 8.1$ Hz, 4H), 7.09-7.17 (m, 2H), 2.59 (s, 3H), 1.78 (s, 3H).  **$^{13}C$ -NMR** ( $CDCl_3$ , 100Hz)  $\delta$  195.2, 182.4, 163.2, 161.3, 138.3, 136.9, 135.6, 134.1, 131.1, 129.6, 128.9, 128.8, 124.9, 123.6, 120.3, 120.0, 103.7, 76.5, 22.3, 16.3. **HRMS** Calcd for  $C_{26}H_{23}ClN_3O_3$  ( $[M + H]^+$ ) 460.1428; Found 460.1416.

---

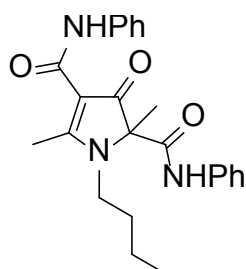

1-butyl-2,5-dimethyl-3-oxo- $N^2,N^4$ -diphenyl-2,3-dihydro-1*H*-pyrrole-2,4-dicarboxamide

**(2be)** Yellow solid; mp 193-195 °C.  **$^1H$ -NMR** ( $CDCl_3$ , 400 MHz)  $\delta$  10.08 (s, 1H), 9.22 (s, 1H), 7.63 (d,  $J = 8.0$ Hz, 2H), 7.53 (d,  $J = 8.0$ Hz, 2H), 7.29-7.36 (m, 4H), 7.14 (t,  $J = 7.2$ Hz, 1H), 7.06 (t,  $J = 7.2$ Hz, 1H), 3.82-4.05 (m, 2H), 2.85 (s, 3H), 1.58-1.88 (m, 2H), 1.80 (s, 3H), 1.41-1.49 (m, 2H), 1.01 (t,  $J = 7.2$ Hz, 3H).  **$^{13}C$ -NMR** ( $CDCl_3$ , 100Hz)  $\delta$  194.3, 180.9, 163.7, 161.7, 138.7, 137.0, 129.0, 128.8, 124.8, 123.3, 120.1, 120.0, 102.5, 74.6, 45.4, 32.3, 22.8, 20.3, 15.0, 13.5. **HRMS** Calcd for  $C_{24}H_{28}N_3O_3$  ( $[M + H]^+$ ) 406.2131; Found 406.2118.

---

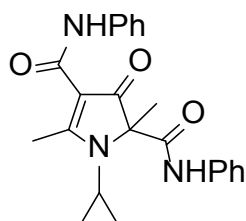

1-cyclopropyl-2,5-dimethyl-3-oxo- $N^2,N^4$ -diphenyl-2,3-dihydro-1*H*-pyrrole-2,4-dicarboxamide

**(2bf)** Yellow solid; mp 191-194 °C.  **$^1H$ -NMR** ( $CDCl_3$ , 400 MHz)  $\delta$  10.03 (s, 1H), 8.40 (s, 1H), 7.60 (d,  $J = 8.0$ Hz, 2H), 7.50 (d,  $J = 8.0$ Hz, 2H), 7.27-7.35 (m, 4H), 7.13 (t,  $J = 7.2$ Hz, 1H), 7.05 (t,  $J = 7.2$ Hz, 1H), 2.98 (s, 3H), 2.90-2.94 (m, 1H), 1.85 (s, 3H), 1.26-1.33 (m, 1H), 1.01-1.15 (m, 2H), 0.91-1.00 (m, 1H).  **$^{13}C$ -NMR** ( $CDCl_3$ , 100Hz)  $\delta$  194.5, 185.2, 164.0, 161.5, 138.5, 137.1, 129.0, 128.8, 124.8, 123.5, 120.3, 120.2, 103.5, 76.7, 27.5, 21.1, 15.7, 7.6, 6.1. **HRMS** Calcd for  $C_{23}H_{24}N_3O_3$  ( $[M + H]^+$ ) 390.1818; Found 390.1798.

---

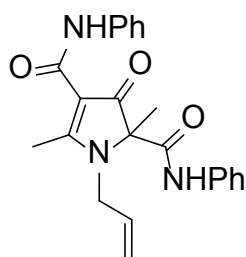

1-allyl-2,5-dimethyl-3-oxo- $N^2,N^4$ -diphenyl-2,3-dihydro-1*H*-pyrrole-2,4-dicarboxamide

(**2bg**) Yellow solid; mp 136-139 °C.  $^1\text{H-NMR}$  ( $\text{CDCl}_3$ , 300 MHz)  $\delta$  10.08 (s, 1H), 9.25 (s, 1H), 7.63 (d,  $J$  = 8.1Hz, 2H), 7.53(d,  $J$  = 8.1Hz, 2H), 7.29-7.37 (m, 4H), 7.14 (t,  $J$  = 7.2Hz, 1H), 7.06 (t,  $J$  = 7.2Hz, 1H), 5.88-6.00 (m, 1H), 5.21-5.34 (m, 2H), 4.54-4.76 (m, 2H), 2.83 (s, 3H), 1.78 (s, 3H).  $^{13}\text{C-NMR}$  ( $\text{CDCl}_3$ , 100Hz)  $\delta$  194.4, 181.9, 163.8, 161.6, 138.5, 136.9, 132.8, 129.0, 128.8, 124.8, 123.3, 120.0, 119.9, 118.2, 102.6, 74.4, 47.8, 22.6, 15.0. **HRMS** Calcd for  $\text{C}_{23}\text{H}_{24}\text{N}_3\text{O}_3$  ( $[\text{M} + \text{H}]^+$ ) 390.1818; Found 390.1845.

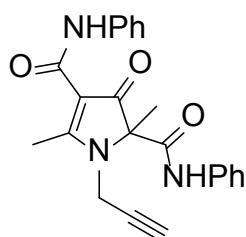

2,5-dimethyl-3-oxo- $N^2,N^4$ -diphenyl-1-(prop-2-yn-1-yl)-2,3-dihydro-1*H*-pyrrole-2,4-dicarboxamide

(**2bh**) Yellowish solid; mp: 155-157 °C.  $^1\text{H-NMR}$  ( $\text{CDCl}_3$ , 300 MHz)  $\delta$  10.01 (s, 1H), 9.28 (s, 1H), 7.62-7.64 (m, 2H), 7.52-7.55 (m, 2H), 7.32-7.37 (m, 4H), 7.05-7.15 (m, 4H), 5.02-5.09 (m, 1H), 4.57-4.64 (m, 1H), 2.97 (s, 3H), 2.40-2.41 (m, 1H), 1.89 (s, 3H).  $^{13}\text{C-NMR}$  ( $\text{CDCl}_3$ , 100Hz)  $\delta$  195.0, 181.8, 164.0, 161.4, 138.5, 136.8, 129.5, 129.1, 128.8, 125.0, 123.6, 120.1, 103.5, 77.3, 73.8, 65.8, 34.2, 23.0, 14.8. **HRMS** Calcd for  $\text{C}_{23}\text{H}_{22}\text{N}_3\text{O}_3$  ( $[\text{M} + \text{H}]^+$ ) 388.1661; Found 388.1668.

**Synthesis and analytical data for compounds 2ca and 2cb.** (with **2ca** as an example): To a solution of the **1a** (2 mmol) and  $\text{NH}_4\text{OAc}$  (1.2 mmol) dissolved in DMF (6 mL) was added 0.1 equiv of  $\text{CuBr}_2$  (0.2 mmol) and 0.5 equiv of 4-methylbenzenesulfonic acid (1 mmol). The mixture was warmed to 100 °C and stirred for 6 h. When **1a** disappeared (monitored by TLC), the reaction mixture was then treated with 50 mL brine, and extracted with dichloromethane ( $2 \times 50$  mL). The combined organic layer was washed with brine ( $3 \times 50$  mL), dried over  $\text{MgSO}_4$  and filtered. The filtrate was concentrated in *vacuum*, and then purified by silica gel column chromatography to give **2ca** as a red solid.

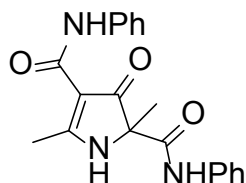

2,5-dimethyl-3-oxo- $N^2,N^4$ -diphenyl-2,3-dihydro-1*H*-pyrrole-2,4-dicarboxamide

(**2ca**) Red solid; mp 202-205 °C.  $^1\text{H-NMR}$  ( $\text{CDCl}_3$ , 300 MHz)  $\delta$  9.87 (s, 1H), 9.32 (s, 1H), 8.06 (s, 1H), 7.64 (d,  $J$  = 8.4Hz, 2H), 7.58 (d,  $J$  = 8.1Hz, 2H), 7.30-7.39 (m, 4H), 7.18 (t,  $J$  = 7.2Hz, 1H), 7.08 (t,  $J$  = 7.2Hz, 1H), 2.77 (s, 3H), 1.77 (s, 3H).  $^{13}\text{C-NMR}$  ( $\text{CDCl}_3$ , 100Hz)  $\delta$  195.9, 181.7, 164.8, 161.6, 138.3, 136.4, 129.0, 128.8, 125.3, 123.5, 120.2, 120.0, 102.5, 70.3, 25.0, 17.4. **HRMS** Calcd for  $\text{C}_{20}\text{H}_{20}\text{N}_3\text{O}_3$  ( $[\text{M} + \text{H}]^+$ ) 350.1505; Found 350.1551.



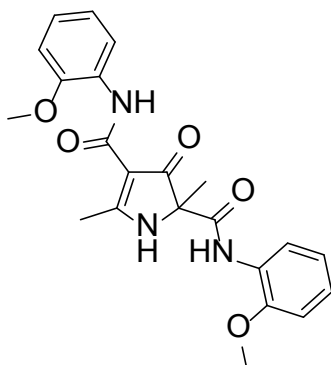

*N*<sup>2</sup>,*N*<sup>4</sup>-bis(4-methoxyphenyl)-2,5-dimethyl-3-oxo-2,3-dihydro-1*H*-pyrrole-2,4-dicarboxamide

**(2cb)** Red solid; mp 113-115 °C. **<sup>1</sup>H-NMR** (DMSO, 300 MHz) δ 10.77 (s, 1H), 10.40 (s, 1H), 9.63 (s, 1H), 8.39 (d, *J* = 7.8Hz, 1H), 8.08 (d, *J* = 7.8Hz, 1H), 6.86-7.09 (m, 6H), 3.91 (s, 6H), 2.64 (s, 3H), 1.63 (s, 3H). **<sup>13</sup>C-NMR** (DMSO, 100Hz) δ 195.1, 181.0, 163.8, 161.3, 148.8, 147.7, 128.4, 126.4, 124.7, 122.5, 120.6, 120.5, 119.8, 119.0, 111.2, 110.7, 100.9, 70.9, 56.0, 55.9, 23.4, 16.8. **HRMS** Calcd for C<sub>22</sub>H<sub>24</sub>N<sub>3</sub>O<sub>5</sub> ([M + H]<sup>+</sup>) 410.1716; Found 410.1788.

---

### III. <sup>1</sup>H- and <sup>13</sup>C-NMR Spectra Copies

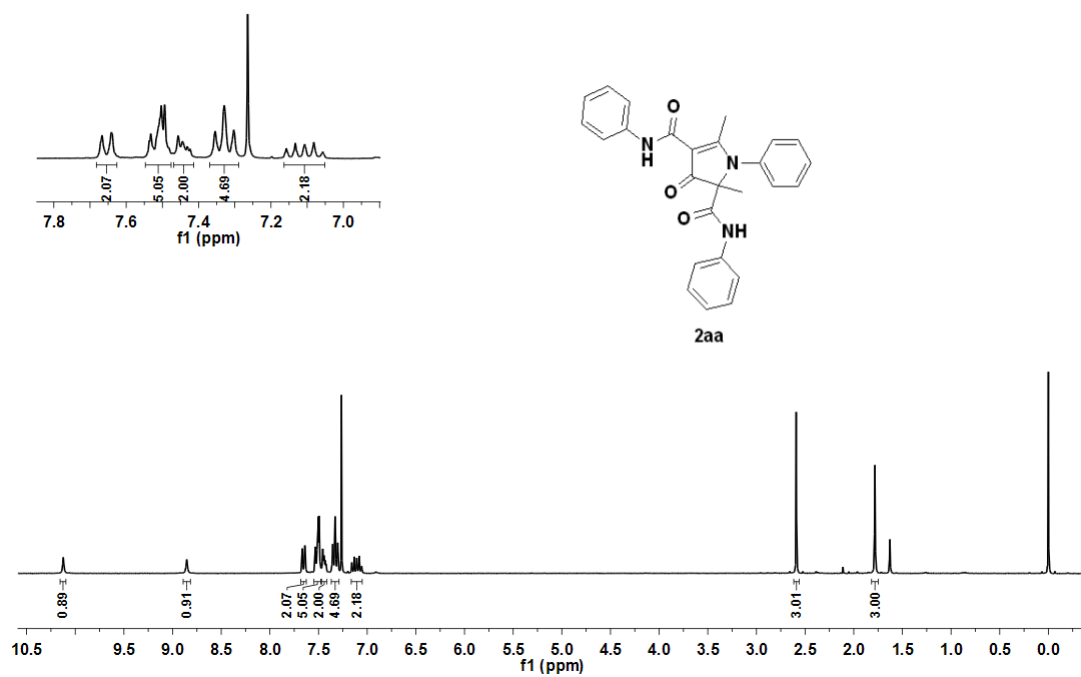

—195.298  
—182.512  
—163.241  
—161.544  
—138.429  
—137.009  
—135.633  
—124.834  
—123.517  
—120.357  
—120.051  
—103.547  
—76.684  
—22.075  
—16.365

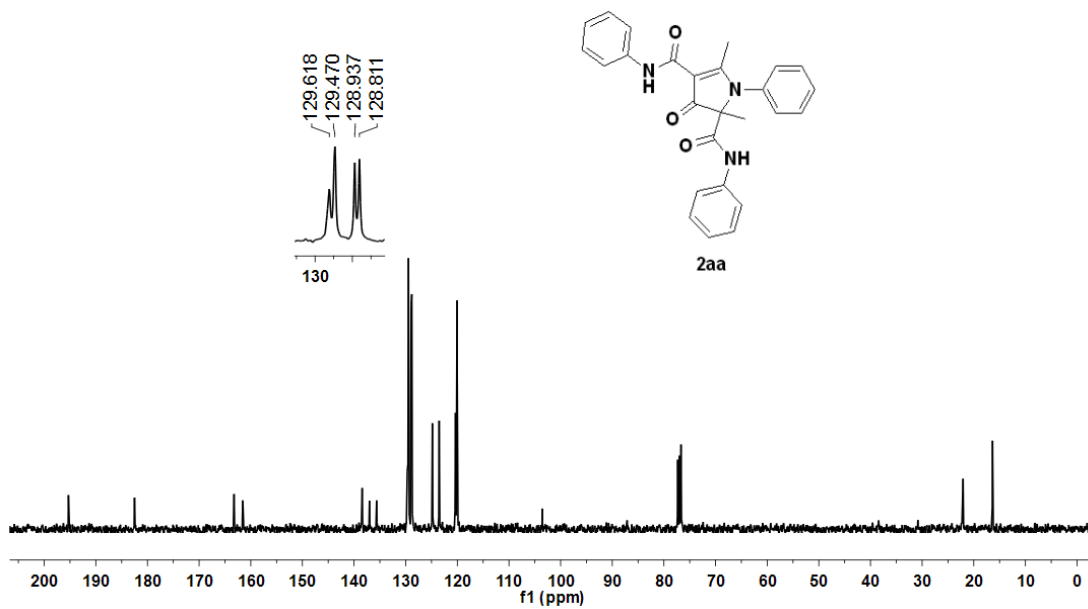

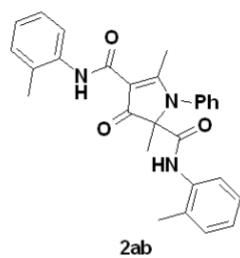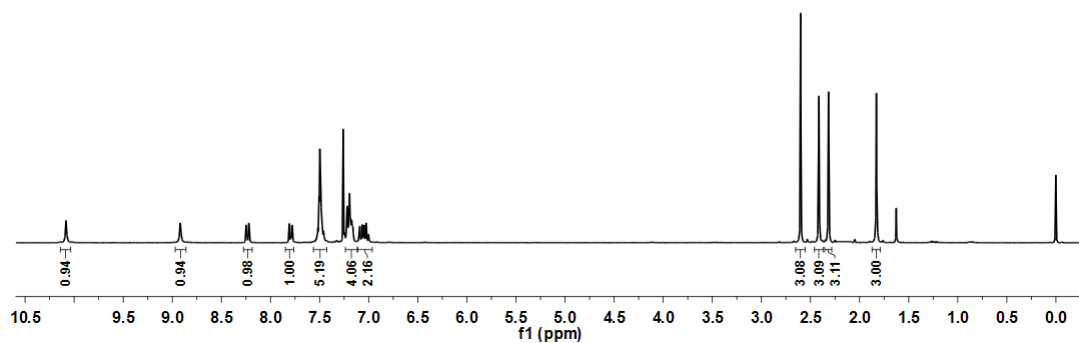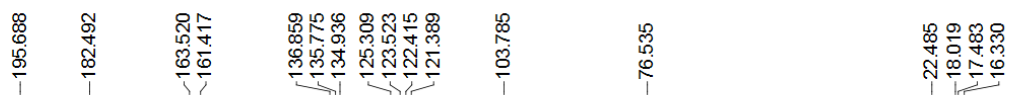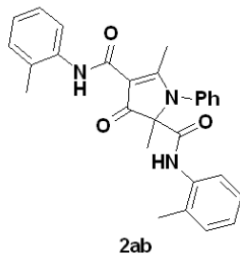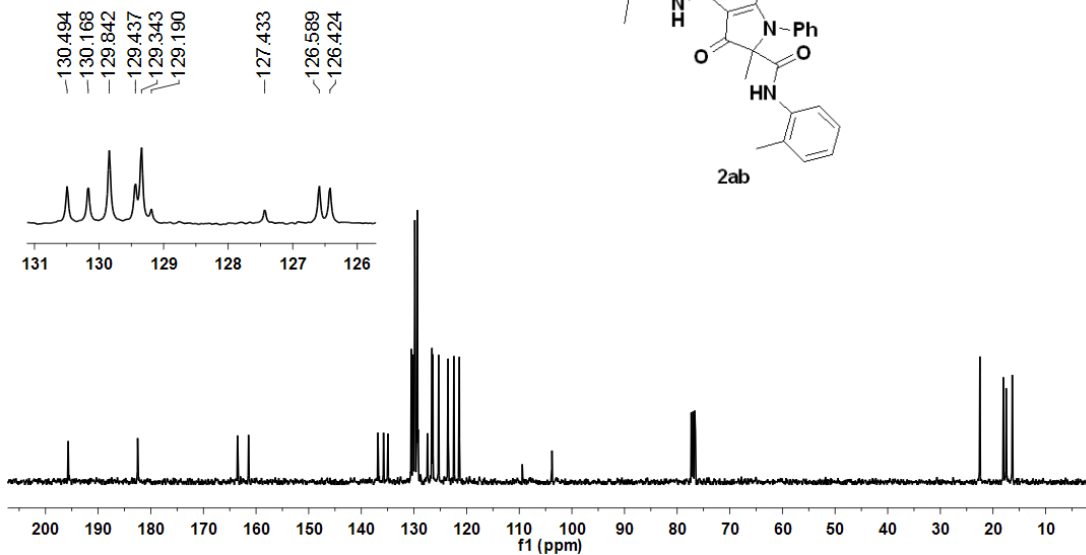

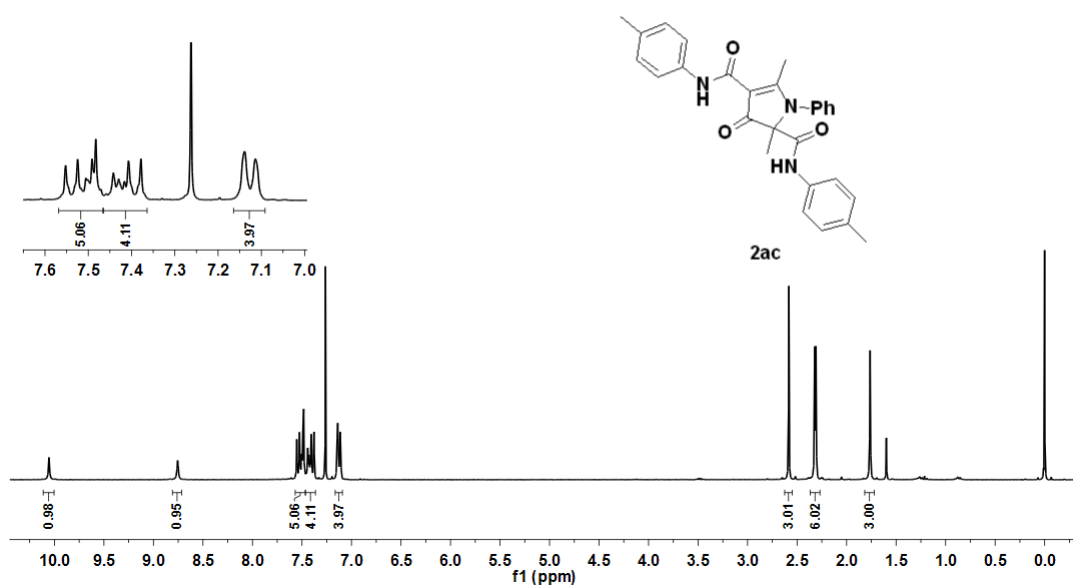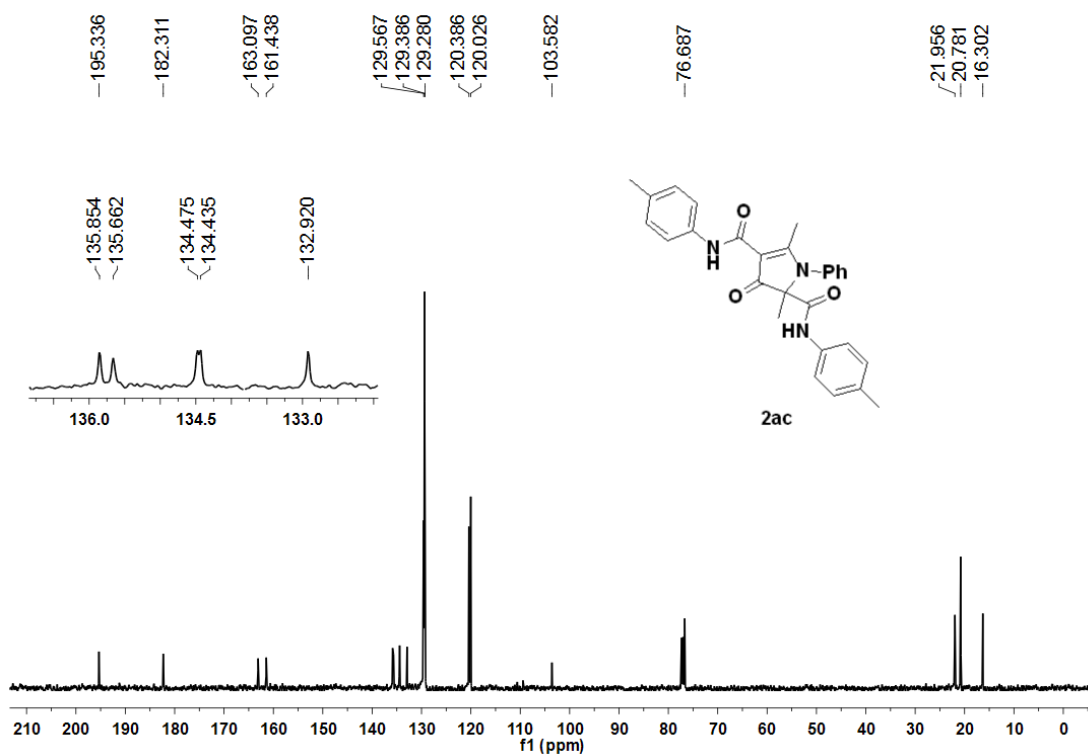

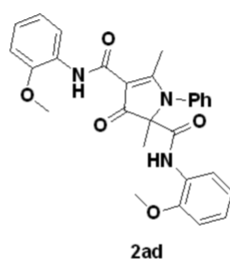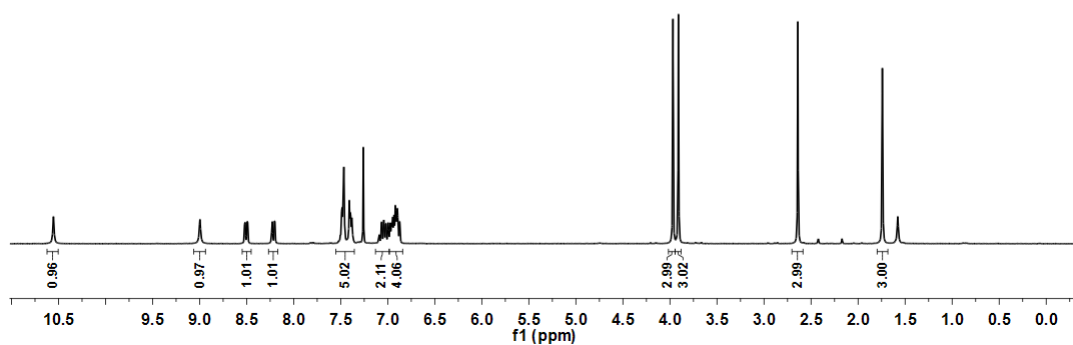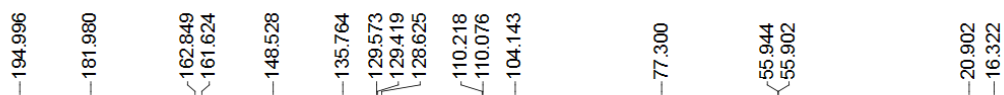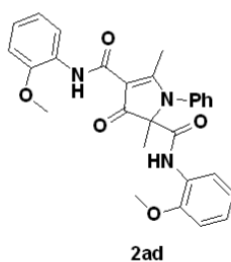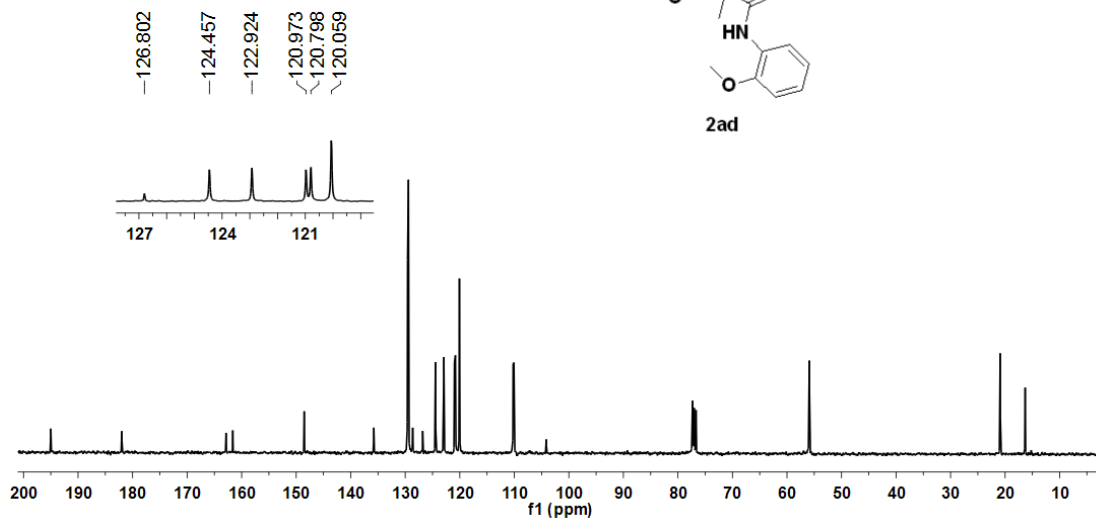

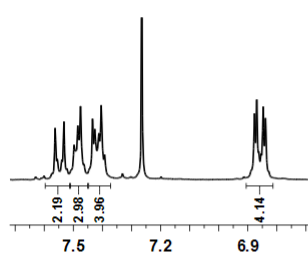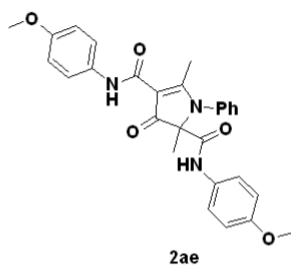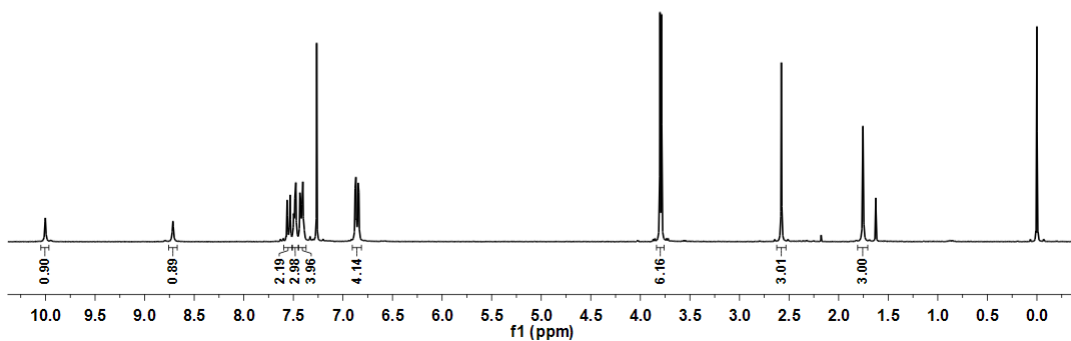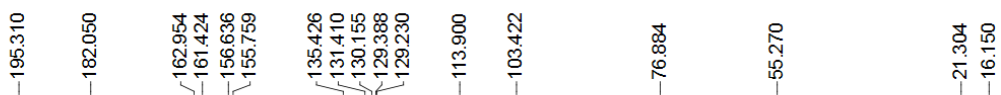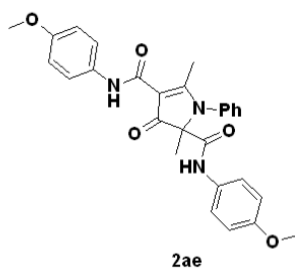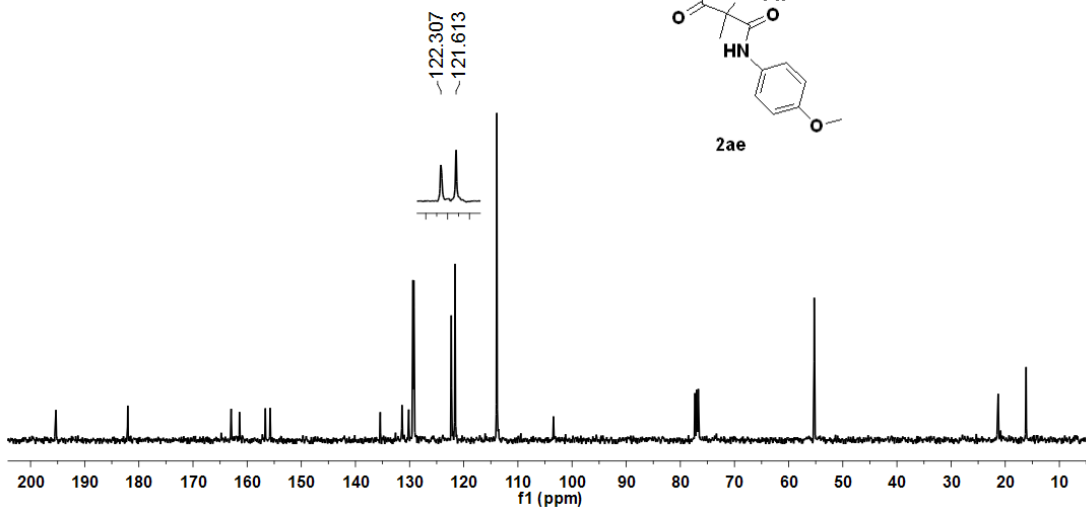

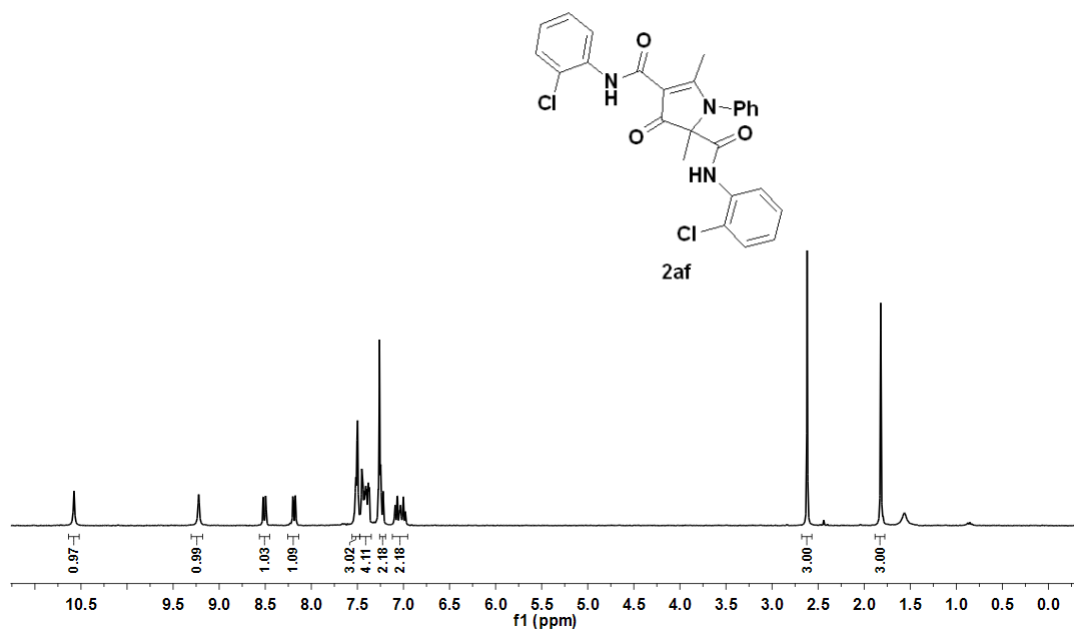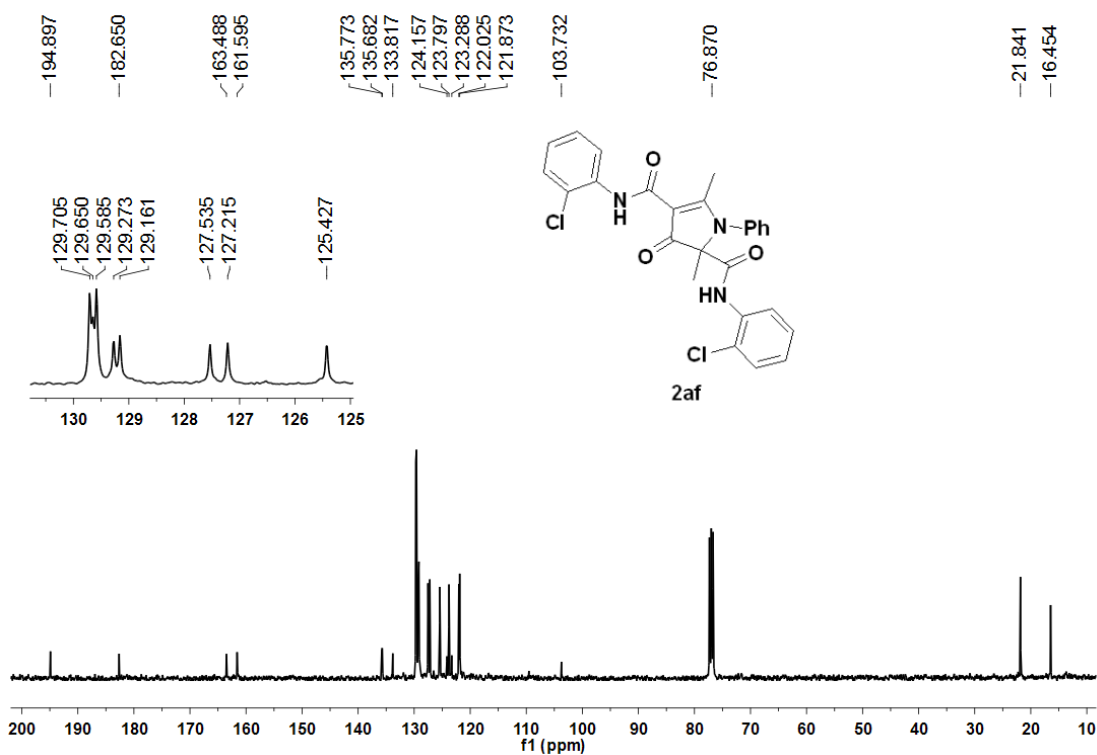

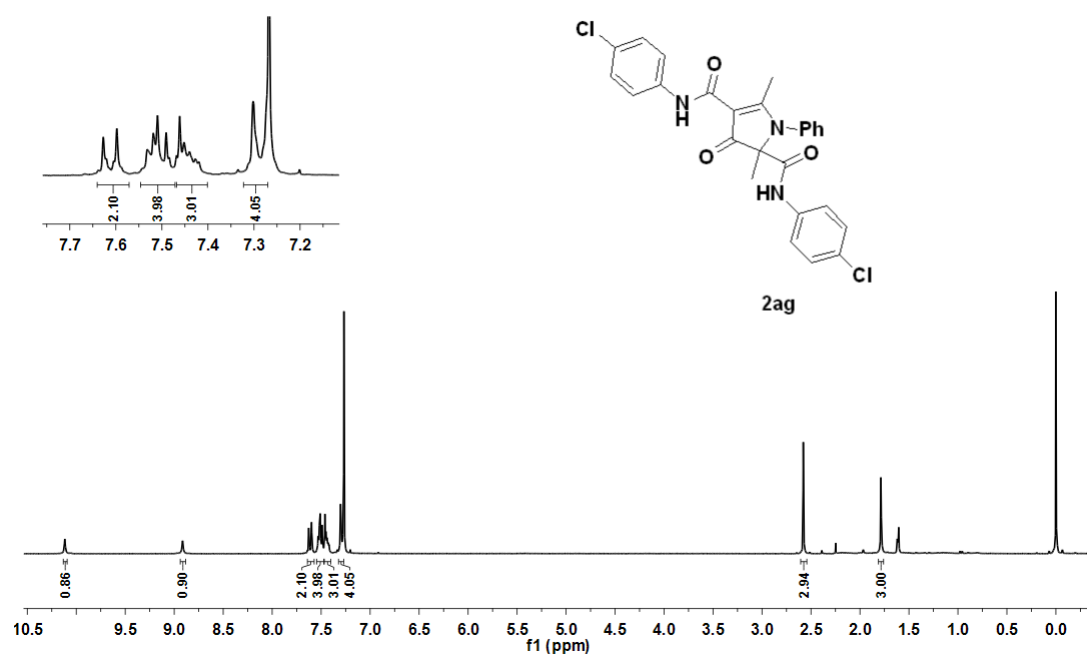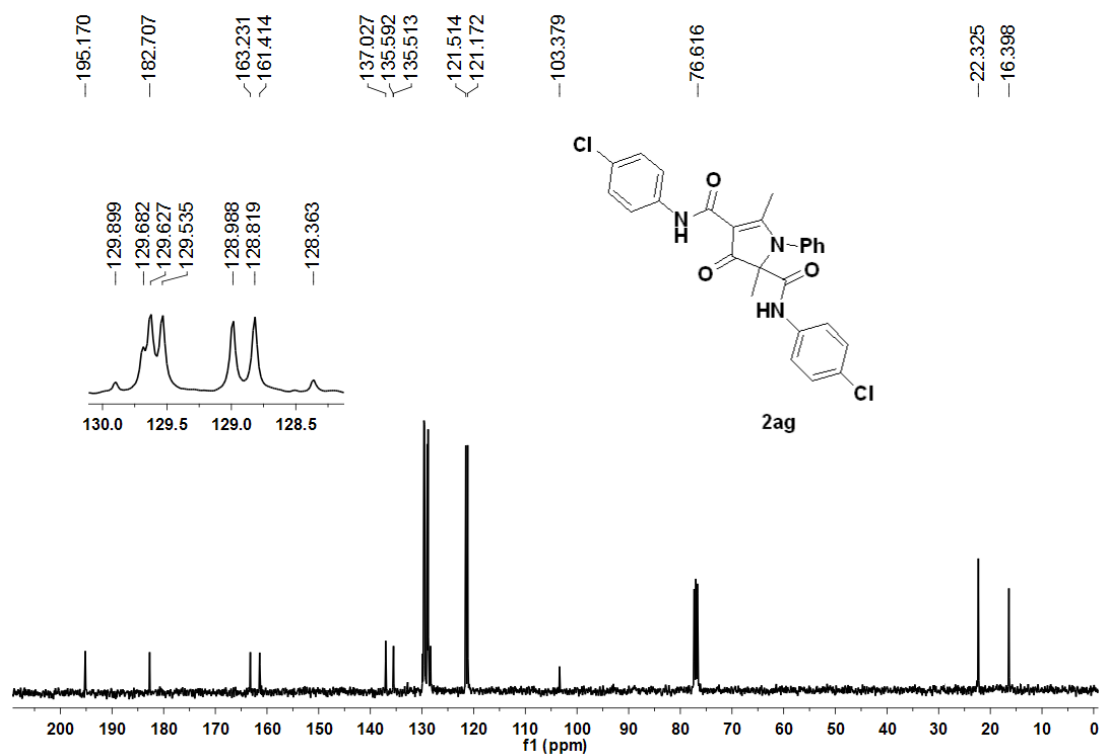



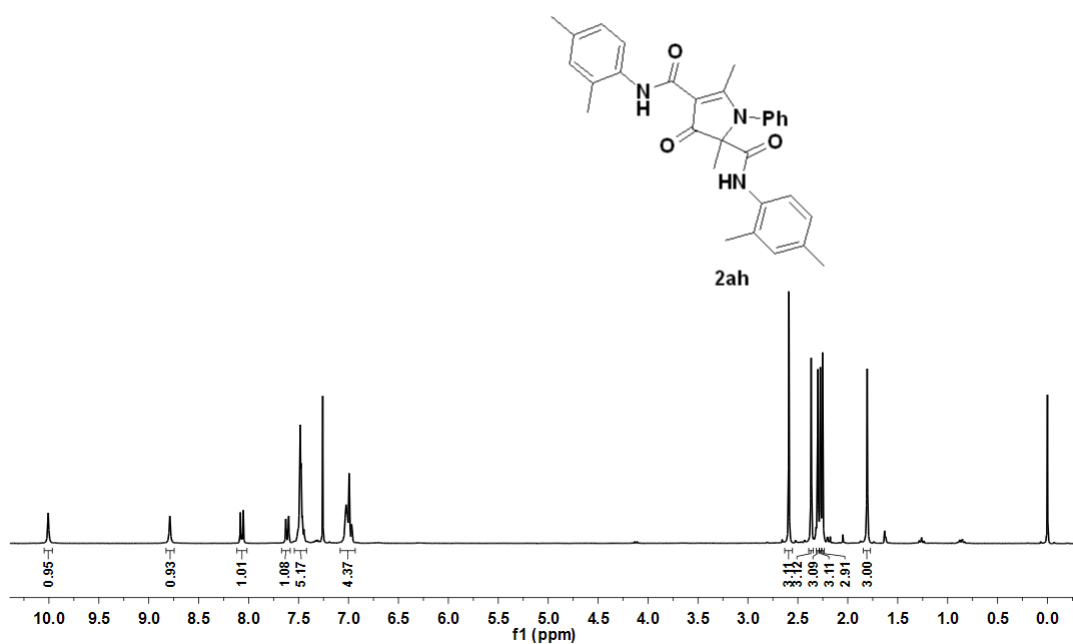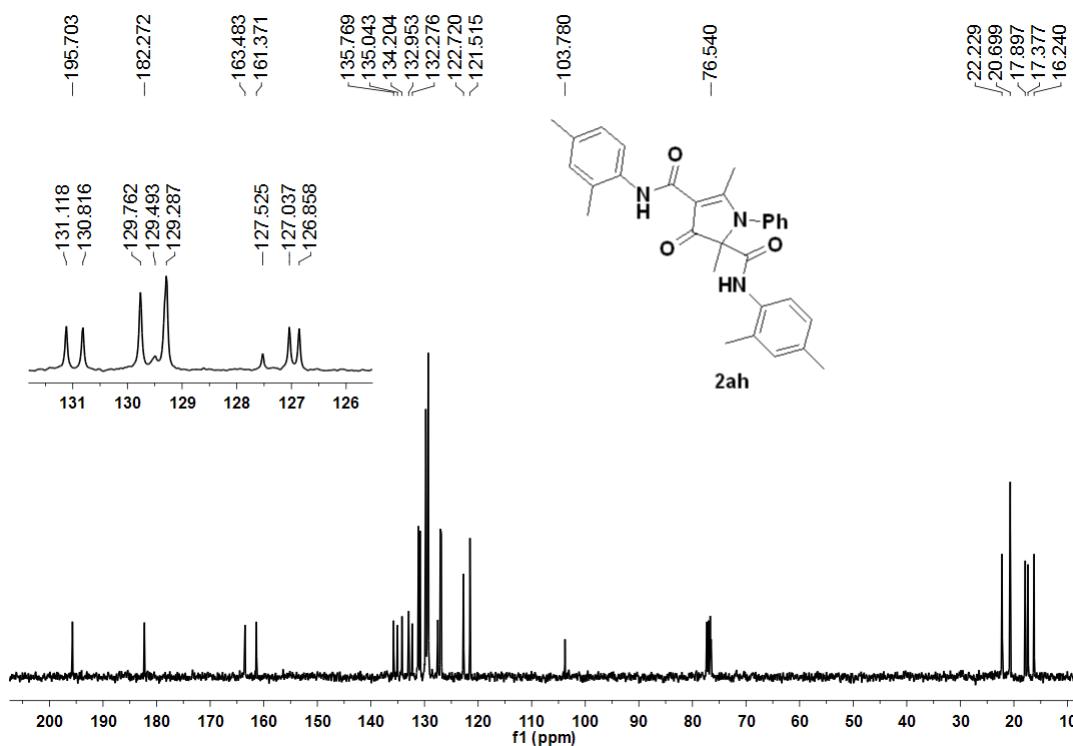

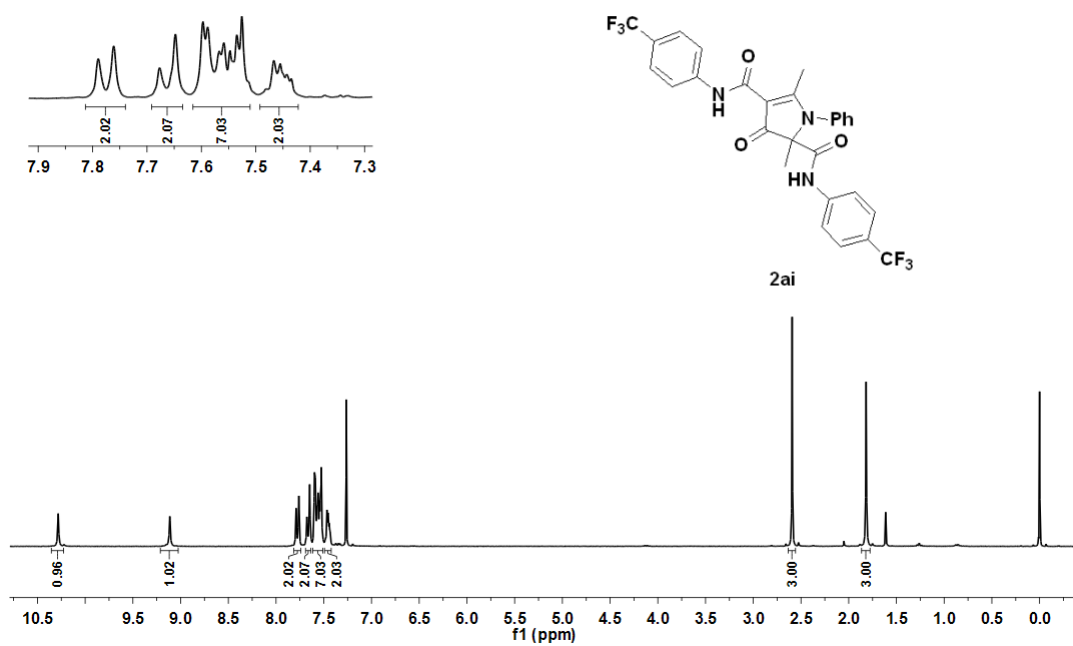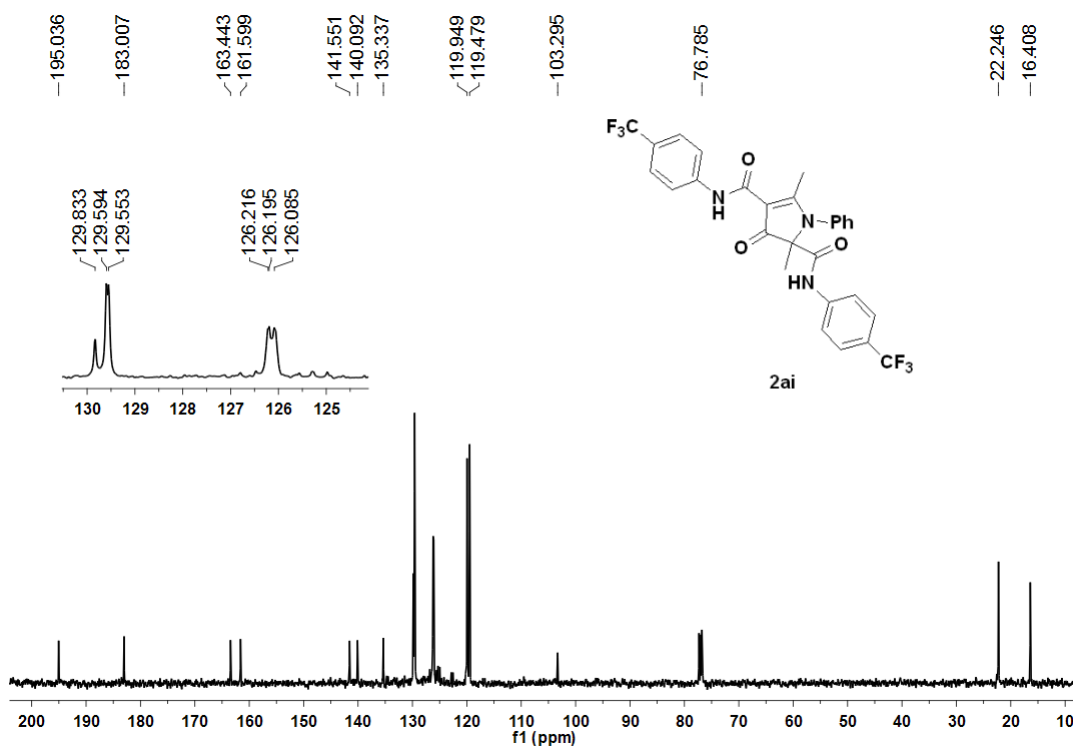

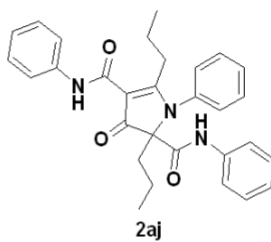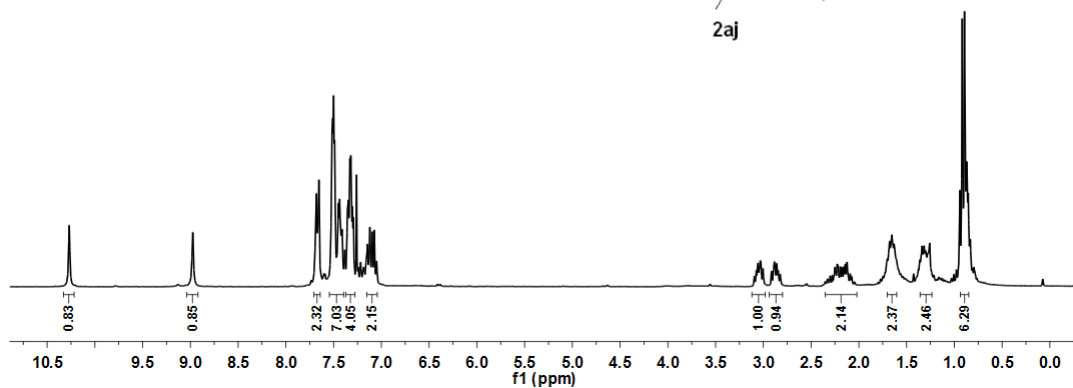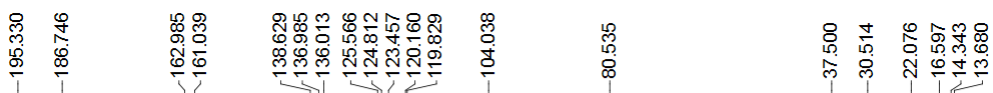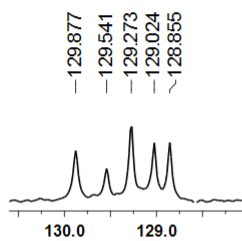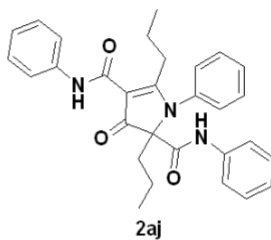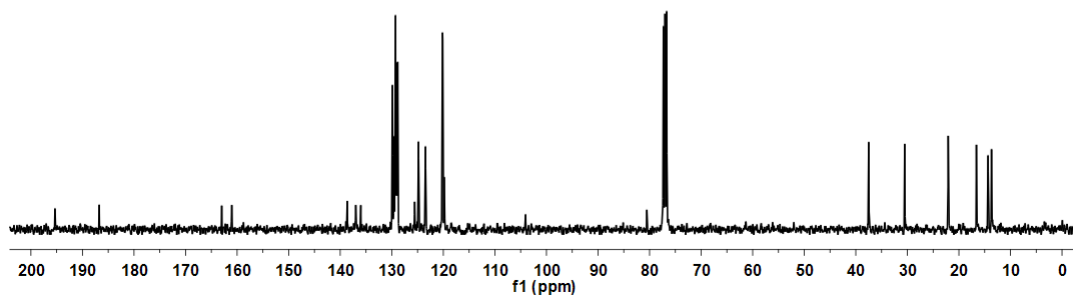

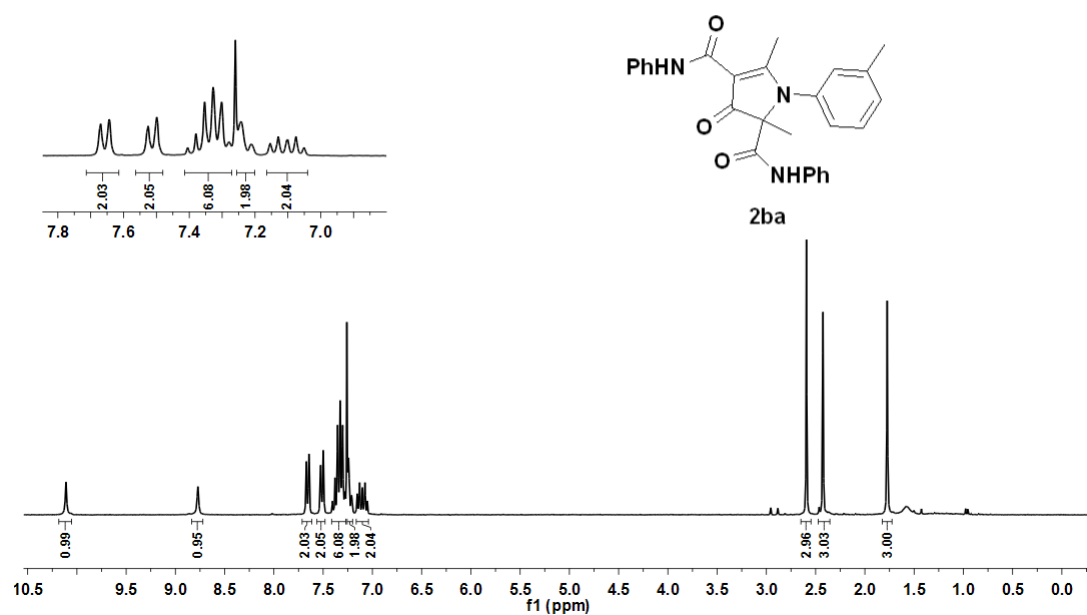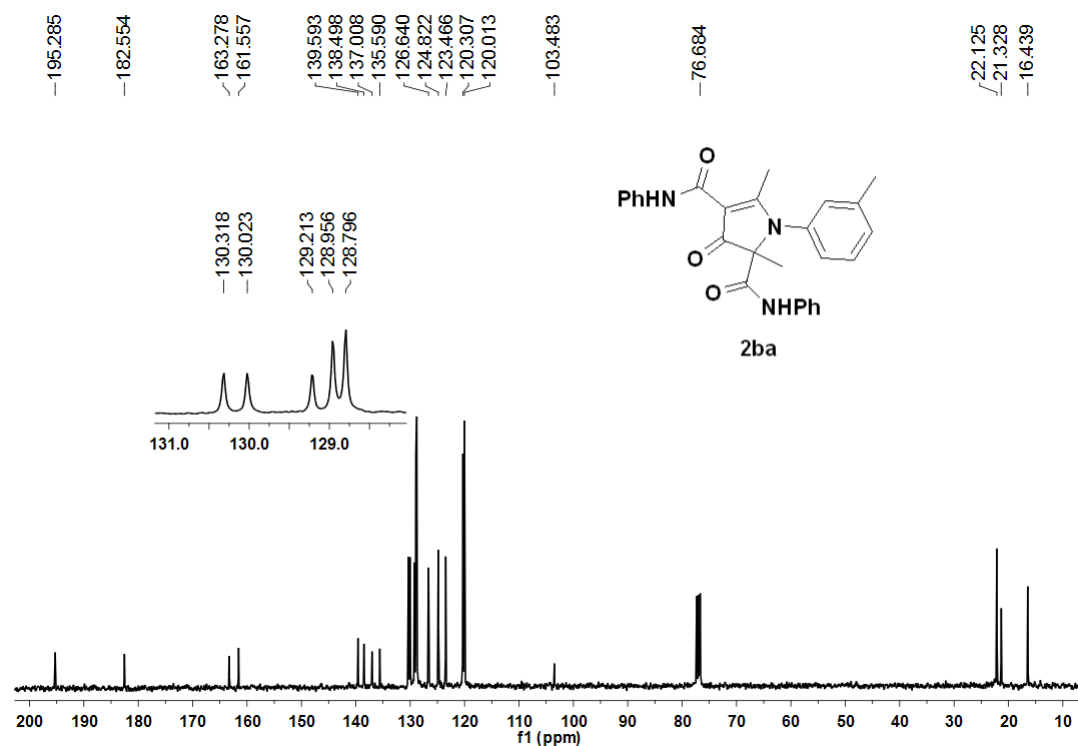

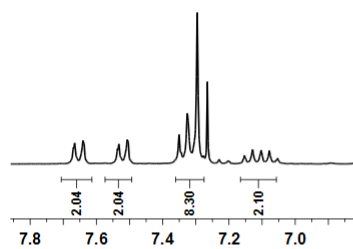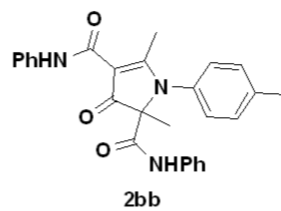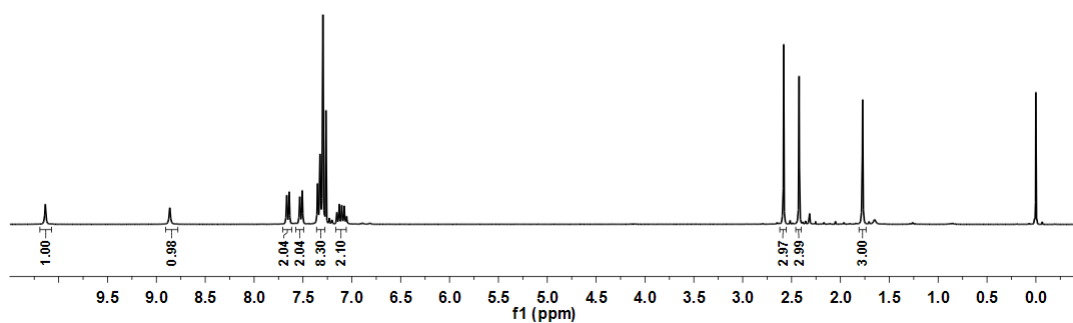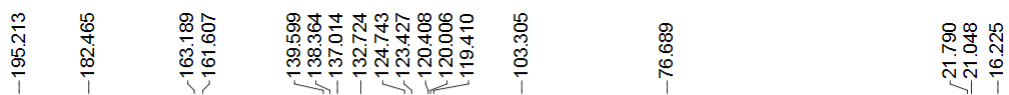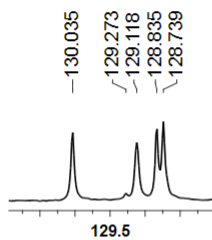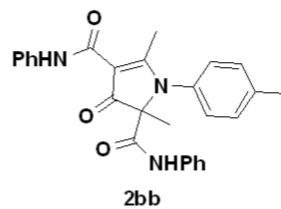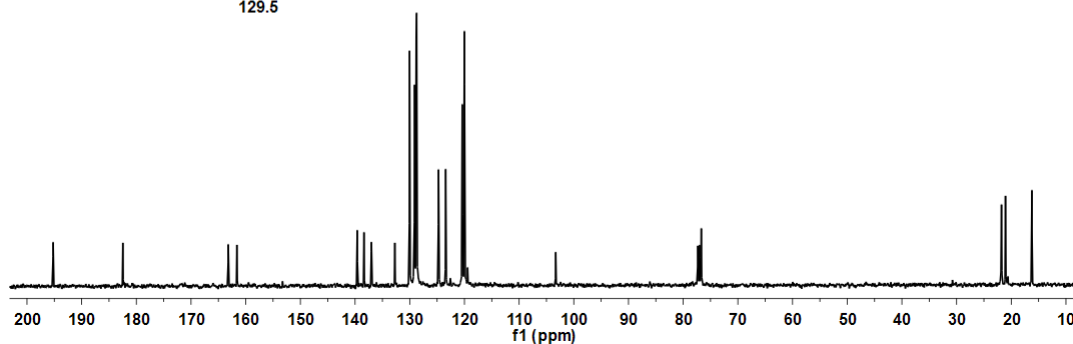

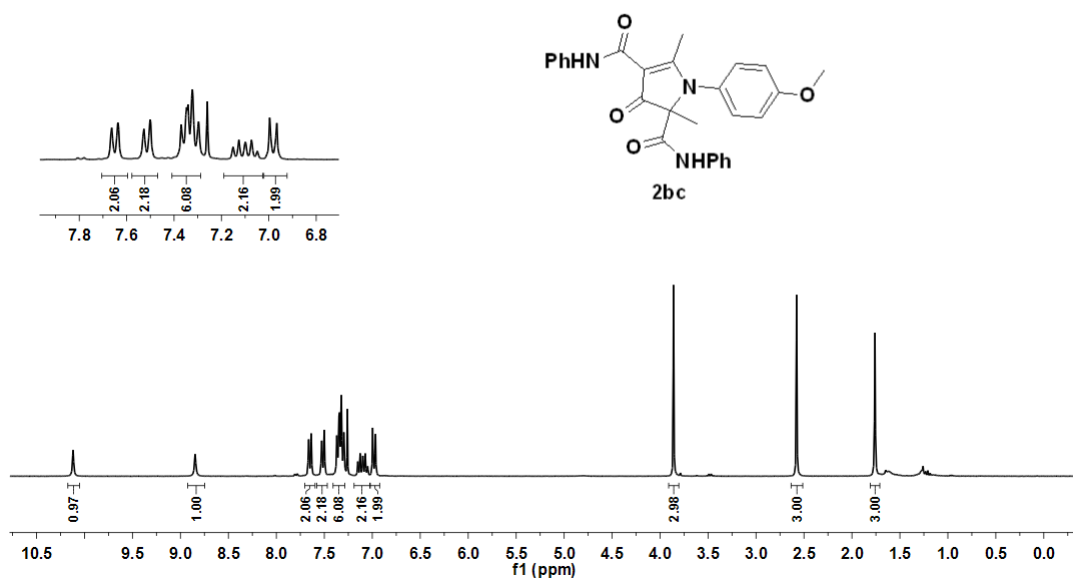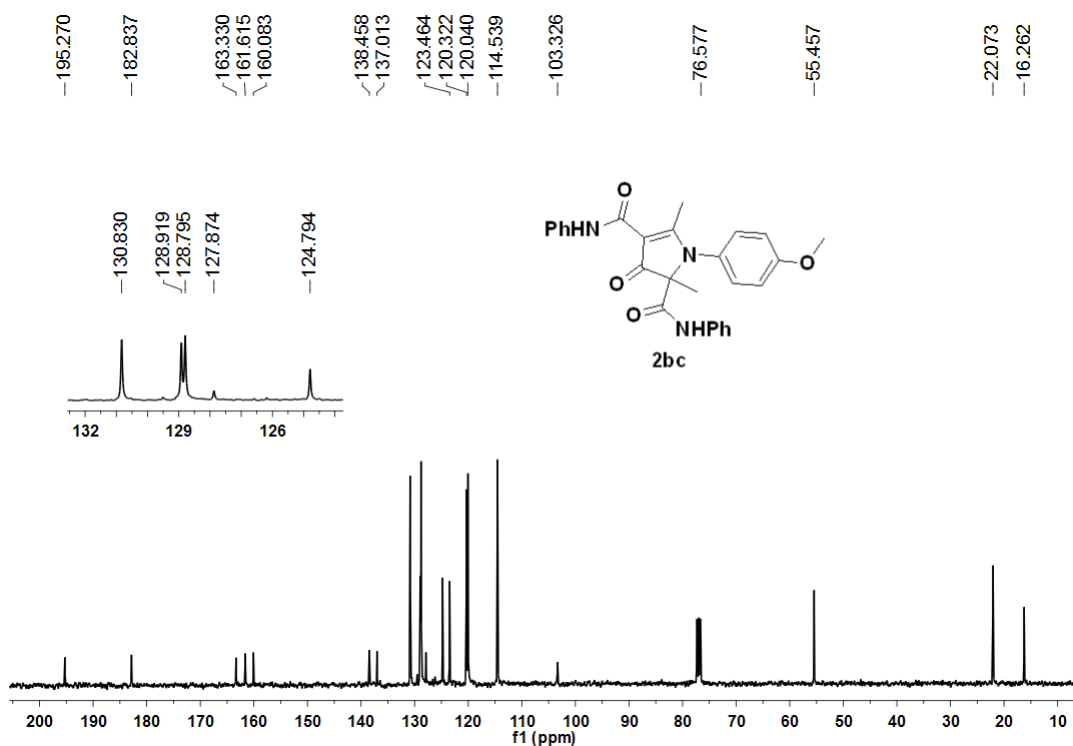

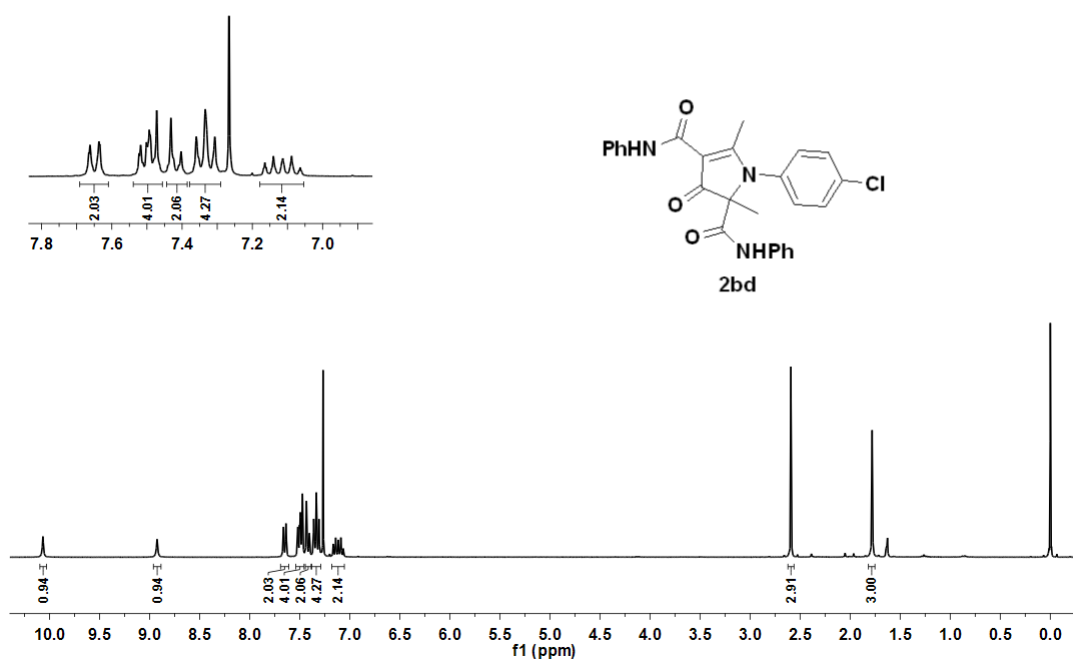

—195.231  
—182.410  
~163.157  
~161.297  
138.297  
136.877  
135.614  
134.101  
124.903  
123.601  
120.323  
120.050  
—103.731  
—76.458  
—22.290  
—16.278

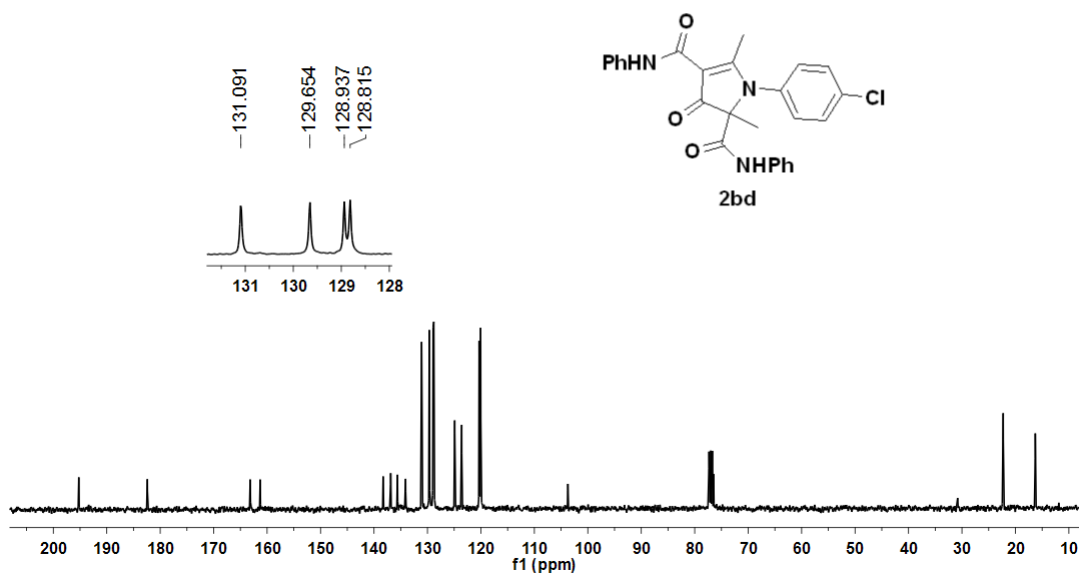

—131.091  
—129.654  
—128.937  
—128.815

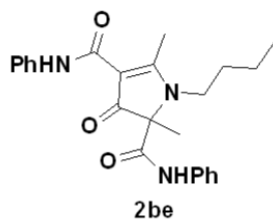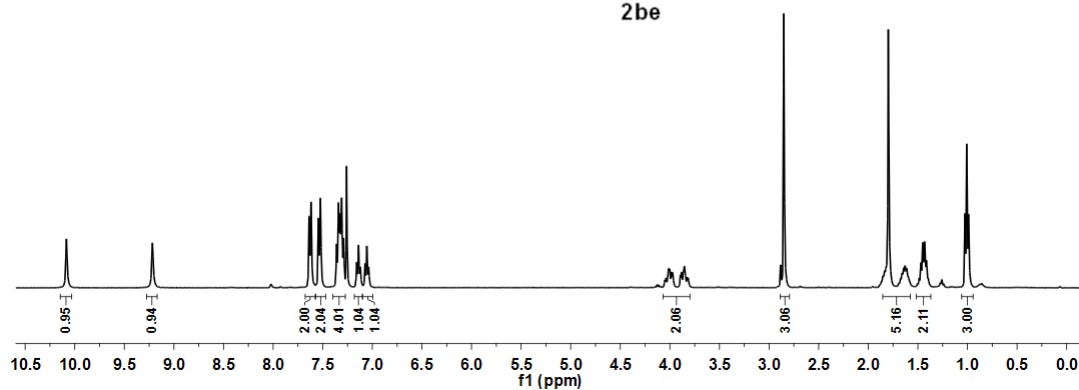

Chemical shift values (ppm): -194.277, -180.929, 163.739, 161.718, 138.679, 137.027, 128.973, 128.754, 124.826, 123.310, 120.126, 119.998, 102.487, 74.656, 45.384, 32.311, 22.815, 20.308, 14.980, 13.517.

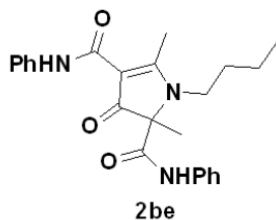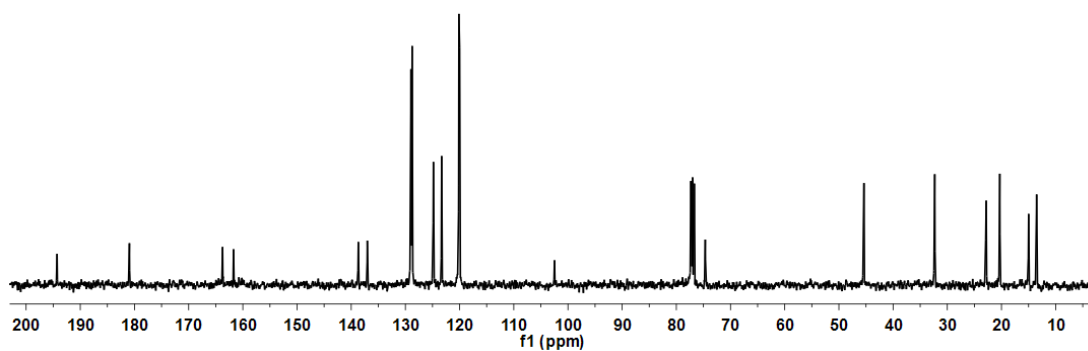



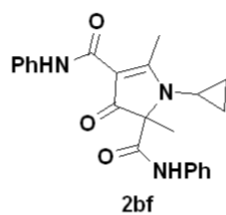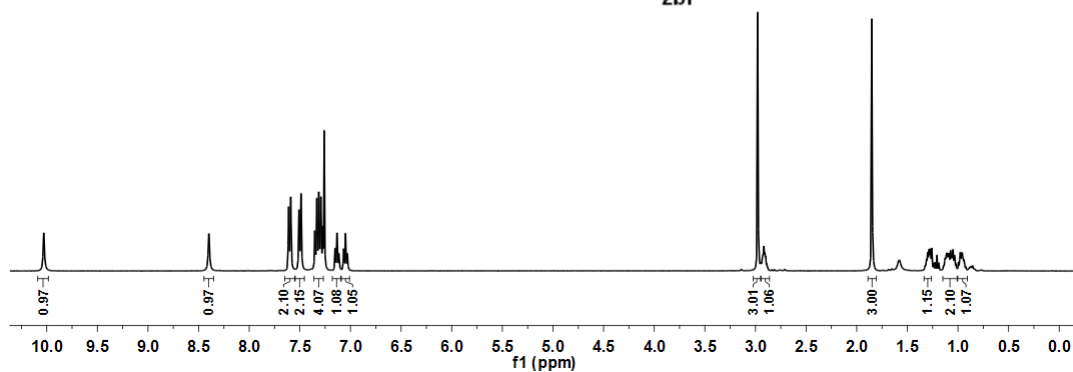

194.508  
185.253  
163.976  
161.536  
138.458  
137.136  
124.850  
123.494  
120.308  
120.162  
103.479  
76.683  
27.508  
21.123  
15.725  
7.563  
6.118

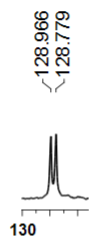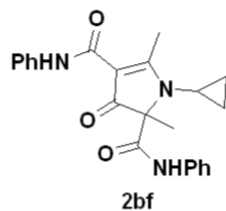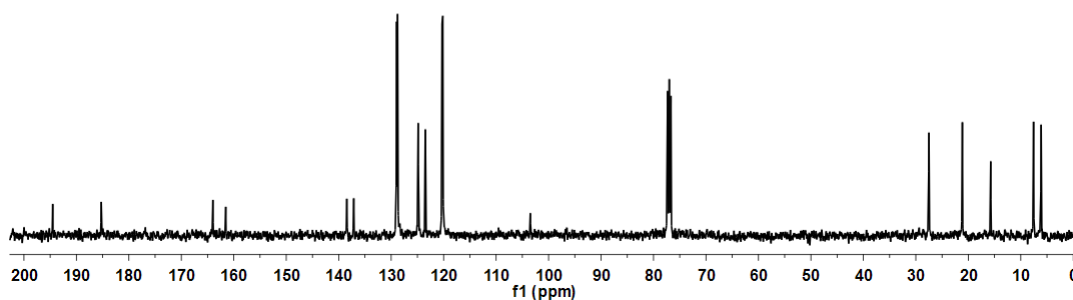

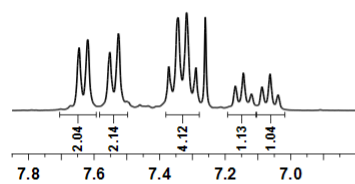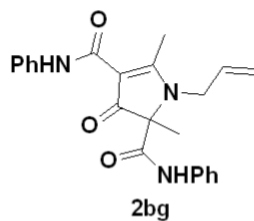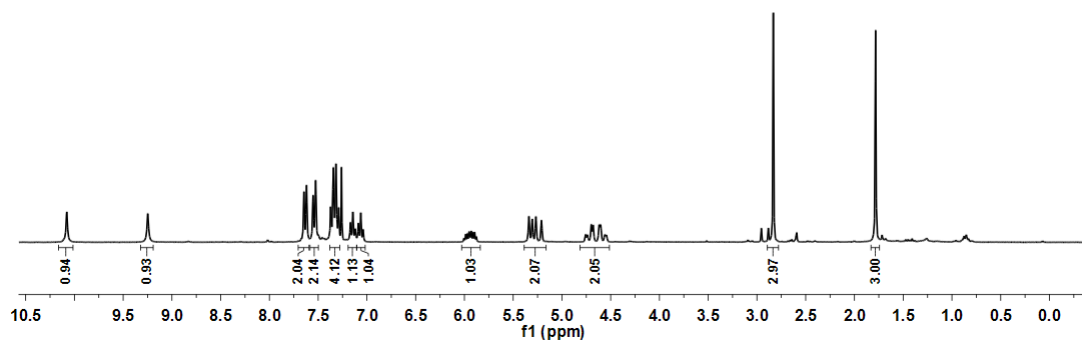

194.460  
181.928  
163.766  
161.569  
138.544  
136.888  
132.805  
120.023  
119.943  
118.174  
102.595  
74.386  
47.796  
22.611  
15.046

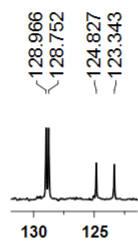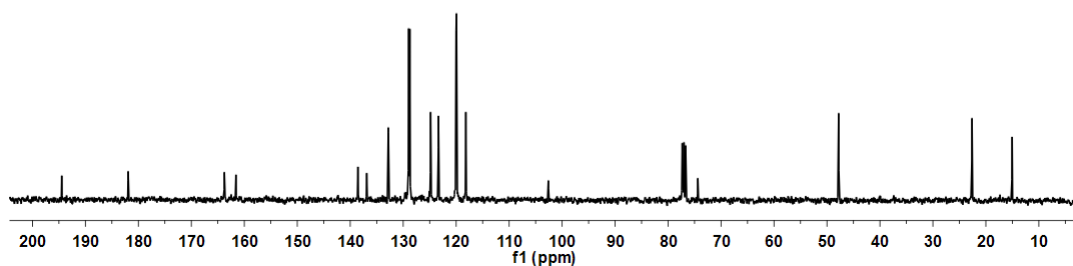

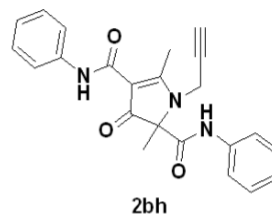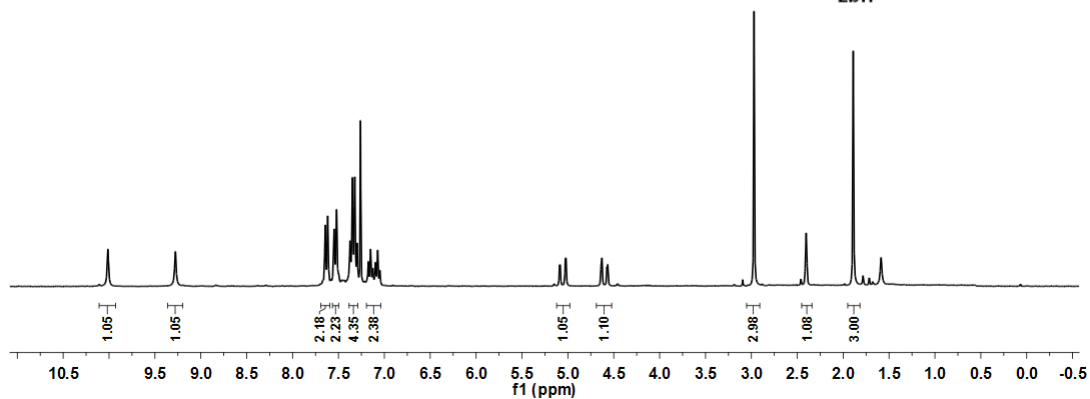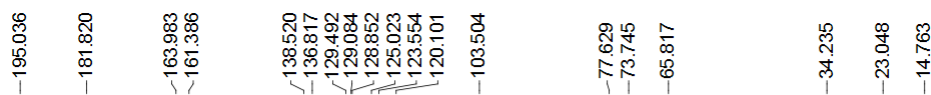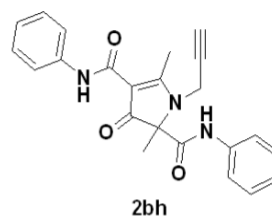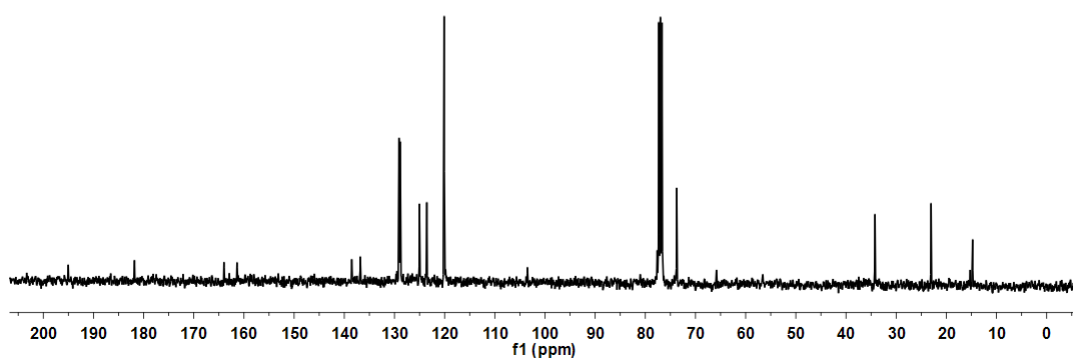

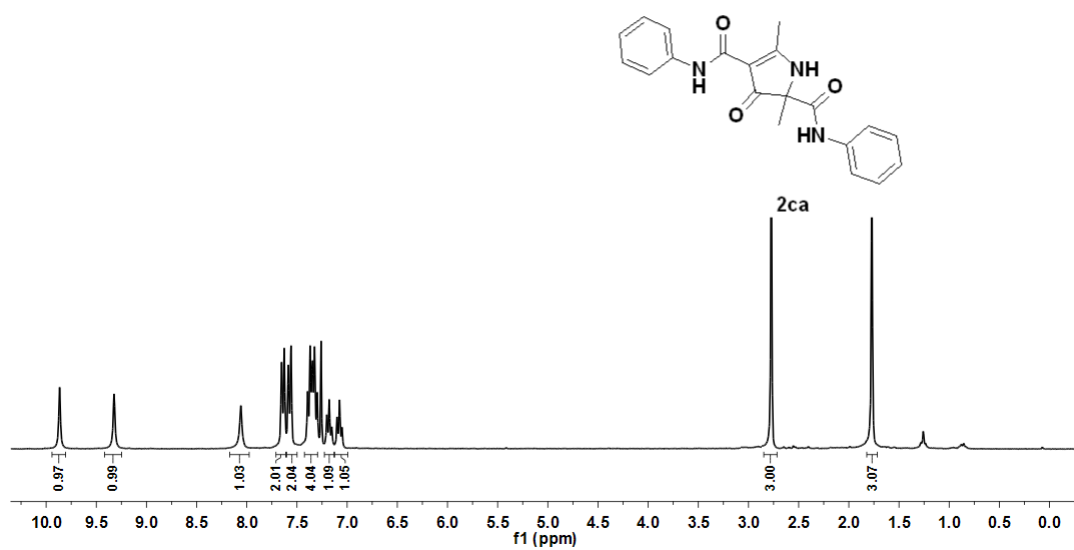

-195.942

-181.686

-164.753

-161.578

138.347

-136.419

125.322

123.510

120.178

120.000

-102.532

-70.280

-24.982

-17.350

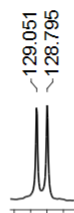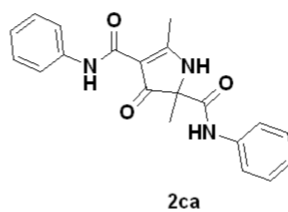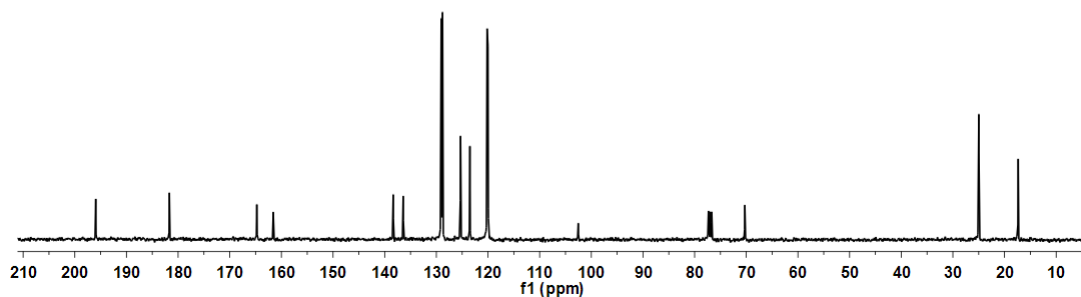

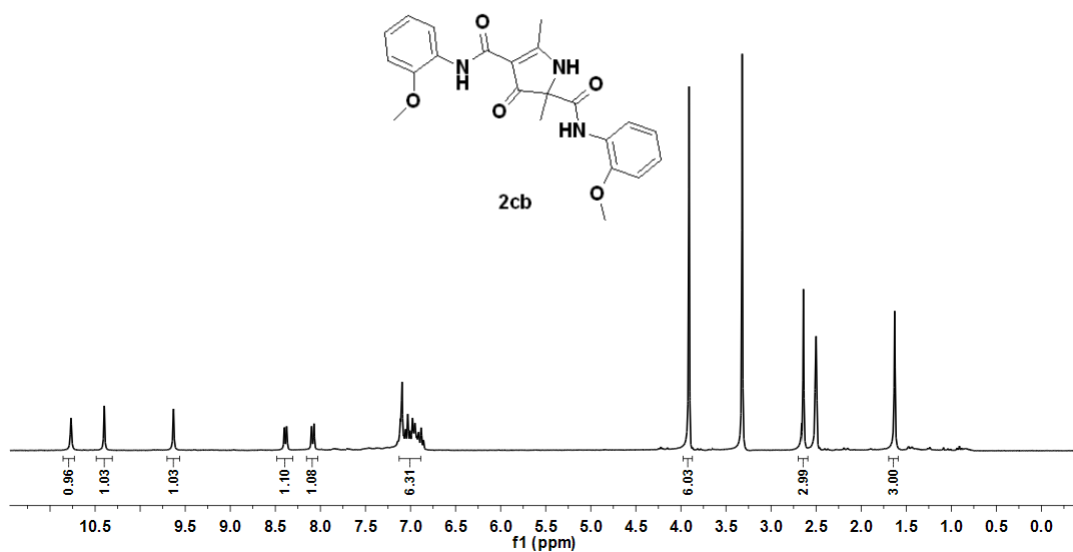

195.095  
181.027  
163.831  
161.280  
148.812  
147.731  
111.204  
110.705  
100.861  
70.898  
56.054  
55.868  
23.405  
16.837

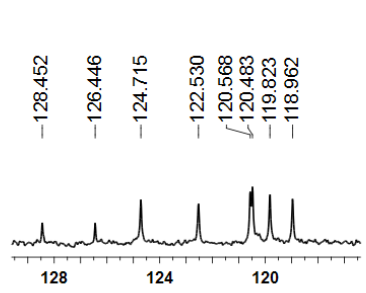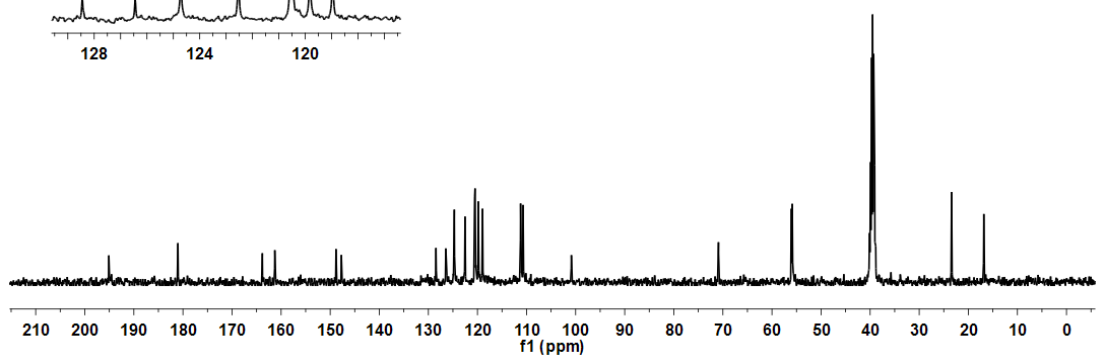

Supplement: c2cc38473f.pdf [file c2cc38473f.pdf]
